# Supplementary material
Source: PubMed Central journal article supplement (PMC516056)
Supplement: nar_32_15_4512__1.pdf [file nar_32_15_4512__1.pdf]

## Supplementary Table Legends

### Supplementary Table S1a-c

All computationally identified DREs in the -5kb to + 2 kb region regardless of MS score. A) Human; B) Mouse and C) Rat Tables include gene name, gene abbreviation, LocusLink, RefSeq, DRE sequence, DRE location, MS Score and strand information.

Header definition:

Refseq: mRNA refseq ID from NCBI

Locuslink: LocusLink ID from NCBI

gene\_abbr: Gene Name Abbreviation

gene\_name: Official Gene Name

match\_ind: location of putative DRE relative to TSS, “-“ indicates upstream of TSS and “=” indicates downstream of TSS

mat\_score: MS score of putative DRE

dre\_seq: actual sequence of putative DRE with length of 19 bp

match\_str: positive or negative strand of identified DRE sequence

### Supplementary Table S2a-c

All computationally identified DREs in the -1500bp to +1500 bp with MS score above the threshold. Tables include gene name, gene abbreviation, LocusLink, RefSeq, DRE sequence, DRE location, MS Score and strand information.

Header definition:

Refseq: mRNA refseq ID from NCBI

Locuslink: LocusLink ID from NCBI

gene\_abbr: Gene Name Abbreviation

gene\_name: Official Gene Name

match\_ind: location of putative DRE relative to TSS, “-“ indicates upstream of TSS and “=” indicates downstream of TSS

mat\_score: MS score of putative DRE

dre\_seq: actual sequence of putative DRE with length of 19 bp

match\_str: positive or negative strand of identified DRE sequence

### Supplementary Table S4a-d

Orthologous genes with DREs:

- A) human-mouse orthologous genes both have DREs in the regions between -1500 and TSS;
- B) human-rat orthologous genes both have DREs in the regions between -1500 and TSS;
- C) mouse-rat orthologous genes both have DREs in the regions between -1500 and TSS;
- D) human-mouse-rat orthologous genes all have DREs in the regions between -1500 and TSS.

All detailed DRE information is available in table S1a-c.

**Supplementary Table S5**

RTPCR Primers of genes which have positionally conserved DREs across human, mouse and rat.
