# Supplementary material
Source: PubMed Central journal article supplement (PMC516056)
Supplement: nar_32_15_4512__5.pdf [file nar_32_15_4512__5.pdf]

| Human gene symbol | Human locuslink | Human refseq | Number of dre | Mouse gene symbol | Mouse locu |
|-------------------|-----------------|--------------|---------------|-------------------|------------|
| AGT               | 183             | NM_000029    | 1             | Agt               | 11606      |
| ALDOA             | 226             | NM_000034    | 1             | Aldo1             | 11674      |
| GLI3              | 2737            | NM_000168    | 1             | Gli3              | 14634      |
| IPF1              | 3651            | NM_000209    | 1             | Ipf1              | 18609      |
| KCNQ1             | 3784            | NM_000218    | 1             | Kcnq1             | 16535      |
| PCBD              | 5092            | NM_000281    | 1             | Pcbd              | 13180      |
| PDHA1             | 5160            | NM_000284    | 1             | Pdha1             | 18597      |
| PEX7              | 5191            | NM_000288    | 1             | Pex7              | 18634      |
| SCA7              | 6314            | NM_000333    | 1             | Sca7              | 246103     |
| SCN4A             | 6329            | NM_000334    | 1             | Scn4a             | 110880     |
| SPTB              | 6710            | NM_000347    | 1             | Spnb1             | 20741      |
| HSD17B1           | 3292            | NM_000413    | 1             | Hsd17b1           | 15485      |
| OXCT              | 5019            | NM_000436    | 1             | Oxct              | 67041      |
| PON1              | 5444            | NM_000446    | 1             | Pon1              | 18979      |
| TWIST1            | 7291            | NM_000474    | 1             | Twist1            | 22160      |
| NCAM1             | 4684            | NM_000615    | 1             | Ncam1             | 17967      |
| IFNAR1            | 3454            | NM_000629    | 1             | Ifnar1            | 15975      |
| ALDH3A1           | 218             | NM_000691    | 1             | Aldh3a1           | 11670      |
| CHRNA3            | 1136            | NM_000743    | 1             | Chrna3            | 110834     |
| CSF2              | 1437            | NM_000758    | 1             | Csf2              | 12981      |
| GABRA2            | 2555            | NM_000807    | 1             | Gabra2            | 14395      |
| GRIN2C            | 2905            | NM_000835    | 1             | Grin2c            | 14813      |
| GUK1              | 2987            | NM_000858    | 1             | Guk1              | 14923      |
| IL2RB             | 3560            | NM_000878    | 1             | Il2rb             | 16185      |
| ITGB7             | 3695            | NM_000889    | 1             | Itgb7             | 16421      |
| PPIC              | 5480            | NM_000943    | 1             | Ppic              | 19038      |
| RPL22             | 6146            | NM_000983    | 1             | Rpl22             | 19934      |
| RPS3              | 6188            | NM_001005    | 1             | Rps3              | 27050      |
| SLC2A4            | 6517            | NM_001042    | 1             | Slc2a4            | 20528      |
| TACR1             | 6869            | NM_001058    | 1             | Tacr1             | 21336      |
| ABP1              | 26              | NM_001091    | 1             | Abp1              | 76507      |
|                   | 10227           | NM_001120    | 1             | Tetran-pending    | 68294      |
| AEBP1             | 165             | NM_001129    | 1             | Aebp1             | 11568      |
| ANXA11            | 311             | NM_001157    | 1             | Anxa11            | 11744      |
| BTF3              | 689             | NM_001207    | 1             |                   | 218490     |
| CALU              | 813             | NM_001219    | 1             | Calu              | 12321      |
| CCNH              | 902             | NM_001239    | 1             | Ccnh              | 66671      |
| CHC1              | 1104            | NM_001269    | 1             | Chc1              | 100088     |
| CIRBP             | 1153            | NM_001280    | 1             | Cirbp             | 12696      |
| DNASE1L2          | 1775            | NM_001374    | 1             | Dnase1l2          | 66705      |
| DRG2              | 1819            | NM_001388    | 1             | Drg2              | 13495      |
| FBL               | 2091            | NM_001436    | 1             | Fbl               | 14113      |
| FABP5             | 2171            | NM_001444    | 1             | Fabp5             | 16592      |
| GPC4              | 2239            | NM_001448    | 1             | Gpc4              | 14735      |
| G6PT1             | 2542            | NM_001467    | 1             | G6pt1             | 14385      |
| ACADSB            | 36              | NM_001609    | 1             | Acadsb            | 66885      |
| ADPRT             | 142             | NM_001618    | 1             | Adprt1            | 11545      |
| APOF              | 319             | NM_001638    | 1             | Apof              | 103161     |
| ATP2A2            | 488             | NM_001681    | 1             | Atp2a2            | 11938      |
| POLR3D            | 661             | NM_001722    | 1             | Polr3d            | 67065      |
| BPGM              | 669             | NM_001724    | 1             | Bpgm              | 12183      |

|         |                |                 |        |
|---------|----------------|-----------------|--------|
| CD34    | 947 NM_001773  | 1 Cd34          | 12490  |
| CDC42   | 998 NM_001791  | 1 Cdc42         | 12540  |
| CDH4    | 1002 NM_001794 | 1 Cdh4          | 12561  |
| CLCN3   | 1182 NM_001829 | 1 Clcn3         | 12725  |
| COL6A2  | 1292 NM_001849 | 1 Col6a2        | 12834  |
| CRYM    | 1428 NM_001888 | 1 Crym          | 12971  |
| CYC1    | 1537 NM_001916 | 1 Cyc1          | 66445  |
| EEF1D   | 1936 NM_001960 | 1 Eef1d         | 66656  |
| EIF4E   | 1977 NM_001968 | 1 Eif4e         | 13684  |
| EPS15   | 2060 NM_001981 | 1 Eps15         | 13858  |
| FAU     | 2197 NM_001997 | 1 Fau           | 14109  |
| GATA4   | 2626 NM_002052 | 1 Gata4         | 14463  |
| GOLGA4  | 2803 NM_002078 | 1 Golga4        | 54214  |
| HSPD1   | 3329 NM_002156 | 1 Hspd1         | 15510  |
| IL9R    | 3581 NM_002186 | 1 Il9r          | 16199  |
| JUN     | 3725 NM_002228 | 1 Jun           | 16476  |
| KCNA6   | 3742 NM_002235 | 1 Kcna6         | 16494  |
| LBR     | 3930 NM_002296 | 1 Lbr           | 98386  |
| LTK     | 4058 NM_002344 | 1 Ltk           | 17005  |
| M6PR    | 4074 NM_002355 | 1 M6pr          | 17113  |
| MAD2L1  | 4085 NM_002358 | 1 Mad2l1        | 56150  |
| MDK     | 4192 NM_002391 | 1 Mdk           | 17242  |
| MST1R   | 4486 NM_002447 | 1 Mst1r         | 19882  |
| NDUFA2  | 4695 NM_002488 | 1 Ndufa2        | 17991  |
| PCDH8   | 5100 NM_002590 | 1 Pcdh8         | 18530  |
| PCNA    | 5111 NM_002592 | 1 Pcna          | 18538  |
| PCTK2   | 5128 NM_002595 | 1 Pctk2         | 237459 |
| POLG    | 5428 NM_002693 | 1 Polg          | 18975  |
| PPY     | 5539 NM_002722 | 1 Ppy           | 19064  |
| PRKACA  | 5566 NM_002730 | 1 Prkaca        | 18747  |
| PTPN4   | 5775 NM_002830 | 1 Ptpn4         | 19258  |
| PCYT2   | 5833 NM_002861 | 1 1110033E03Rik | 68671  |
| RAD51L3 | 5892 NM_002878 | 1 Rad51l3       | 19364  |
| RFX1    | 5989 NM_002918 | 1 Rfx1          | 19724  |
| RPA3    | 6119 NM_002947 | 1 Rpa3          | 68240  |
| RXRA    | 6256 NM_002957 | 1 Rxra          | 20181  |
| MAPK12  | 6300 NM_002969 | 1 Mapk12        | 29857  |
| SATB1   | 6304 NM_002971 | 1 Satb1         | 20230  |
| CCL11   | 6356 NM_002986 | 1 Ccl11         | 20292  |
| MAP2K4  | 6416 NM_003010 | 1 Map2k4        | 26398  |
| SH3GL2  | 6456 NM_003026 | 1 Sh3gl2        | 20404  |
| SH3GL3  | 6457 NM_003027 | 1 Sh3gl3        | 20408  |
| SHC1    | 6464 NM_003029 | 1 Shc1          | 20416  |
| SLC16A1 | 6566 NM_003051 | 1 Slc16a1       | 20501  |
| SNCB    | 6620 NM_003085 | 1 Sncb          | 104069 |
| SNRPA1  | 6627 NM_003090 | 1 Snrpa1        | 68981  |
| SPAG4   | 6676 NM_003116 | 1 1700041K21Rik | 245865 |
| TFAM    | 7019 NM_003201 | 1 Tfam          | 21780  |
| TFAP4   | 7023 NM_003223 | 1 Tfap4         | 83383  |
| TFR2    | 7036 NM_003227 | 1 Trfr2         | 50765  |
| TGFA    | 7039 NM_003236 | 1 Tgfa          | 21802  |
| THOP1   | 7064 NM_003249 | 1 Thop1         | 50492  |

|         |                |                 |        |
|---------|----------------|-----------------|--------|
| ICAM5   | 7087 NM_003259 | 1 Icam5         | 15898  |
| TPD52L1 | 7164 NM_003287 | 1 Tpd52l1       | 21987  |
| TRIP6   | 7205 NM_003302 | 1 Trip6         | 22051  |
| TRPC1   | 7220 NM_003304 | 1 Trpc1         | 22063  |
| TSSC3   | 7262 NM_003311 | 1 Tssc3         | 22113  |
| TST     | 7263 NM_003312 | 1 Tst           | 22117  |
| TTK     | 7272 NM_003318 | 1 Ttk           | 22137  |
| UBE2N   | 7334 NM_003348 | 1 Ube2n         | 93765  |
| UQCRC2  | 7385 NM_003366 | 1 Uqcrc2        | 67003  |
| VIM     | 7431 NM_003380 | 1 Vim           | 22352  |
| XPNPEP2 | 7512 NM_003399 | 1 Xpnpep2       | 170745 |
| ZIC3    | 7547 NM_003413 | 1 Zic3          | 22773  |
| ZNF202  | 7753 NM_003455 | 1 Zfp202        | 80902  |
| ZNF205  | 7755 NM_003456 | 1 Zfp13         | 22654  |
| SYN3    | 8224 NM_003490 | 1 Syn3          | 27204  |
| SPOP    | 8405 NM_003563 | 1 Spop          | 20747  |
| STK24   | 8428 NM_003576 | 1 Stk24         | 223255 |
| CNTNAP1 | 8506 NM_003632 | 1 Cntnap1       | 53321  |
| ENC1    | 8507 NM_003633 | 1 Enc1          | 13803  |
| TNFSF11 | 8600 NM_003701 | 1 Tnfsf11       | 21943  |
| EIF3S10 | 8661 NM_003750 | 1 Eif3          | 13669  |
| B4GALT4 | 8702 NM_003778 | 1 B4galt4       | 56375  |
| CRADD   | 8738 NM_003805 | 1 Cradd         | 12905  |
| DPM1    | 8813 NM_003859 | 1 Dpm1          | 13480  |
| SYNJ2   | 8871 NM_003898 | 1 Synj2         | 20975  |
| APPBP1  | 8883 NM_003905 | 1 Appbp1        | 234664 |
| CPNE3   | 8895 NM_003909 | 1 Cpne3         | 70568  |
| BCL10   | 8915 NM_003921 | 1 Bcl10         | 12042  |
| ATP6V0E | 8992 NM_003945 | 1 Atp6v0e       | 11974  |
| CH25H   | 9023 NM_003956 | 1 Ch25h         | 12642  |
| CLCNKA  | 1187 NM_004070 | 1 Clcnk1        | 12733  |
| GNG11   | 2791 NM_004126 | 1 Gng11         | 66066  |
| HABP2   | 3026 NM_004132 | 1               | 226243 |
| NINJ1   | 4814 NM_004148 | 1 Ninj1         | 18081  |
| SLC7A4  | 6545 NM_004173 | 1 Slc7a4        | 224022 |
| SLC22A8 | 9376 NM_004254 | 1 Slc22a8       | 19879  |
| SURB7   | 9412 NM_004264 | 1 Surb7         | 108098 |
| CRSP8   | 9442 NM_004269 | 1 1500015J03Rik | 68975  |
| BMPR1A  | 657 NM_004329  | 1 Bmpr1a        | 12166  |
| CCNG2   | 901 NM_004354  | 1 Ccng2         | 12452  |
| CD81    | 975 NM_004356  | 1 Cd81          | 12520  |
| COL12A1 | 1303 NM_004370 | 1 Col12a1       | 12816  |
| FOXD2   | 2306 NM_004474 | 1 Foxd2         | 17301  |
| HOXB7   | 3217 NM_004502 | 1 Hoxb7         | 15415  |
| NDUFB2  | 4708 NM_004546 | 1 Ndufb2        | 68198  |
| NDUFC2  | 4718 NM_004549 | 1 1810004I06Rik | 68197  |
| OVOL1   | 5017 NM_004561 | 1 Ovol1         | 18426  |
| RABGGTA | 5875 NM_004581 | 1 Rabggta       | 56187  |
| TBCA    | 6902 NM_004607 | 1 Tbca          | 21371  |
| TOP3A   | 7156 NM_004618 | 1 Top3a         | 21975  |
| MTA1L1  | 9219 NM_004739 | 1 Mta1l1        | 23942  |
| NUMBL   | 9253 NM_004756 | 1 Numbl         | 18223  |

|          |                 |                  |        |
|----------|-----------------|------------------|--------|
| CNOT8    | 9337 NM_004779  | 1 Cnot8          | 69125  |
| SLC9A3R2 | 9351 NM_004785  | 1 Slc9a3r2       | 65962  |
| HAND1    | 9421 NM_004821  | 1 Hand1          | 15110  |
| KIF23    | 9493 NM_004856  | 1 Kif23          | 71819  |
|          | 9518 NM_004864  | 1 Gdf15          | 23886  |
| ABCG1    | 9619 NM_004915  | 1 Abcg1          | 11307  |
| AQP3     | 360 NM_004925   | 1 Aqp3           | 11828  |
| CDK5     | 1020 NM_004935  | 1 Cdk5           | 12568  |
| SLC29A1  | 2030 NM_004955  | 1 Slc29a1        | 63959  |
| GDF10    | 2662 NM_004962  | 1 Gdf10          | 14560  |
| JMJ      | 3720 NM_004973  | 1 Jmj            | 16468  |
| MYBPH    | 4608 NM_004997  | 1 Mybph          | 53311  |
| PDE1C    | 5137 NM_005020  | 1 Pde1c          | 18575  |
| SLC4A3   | 6508 NM_005070  | 1 Slc4a3         | 20536  |
| XBP1     | 7494 NM_005080  | 1 Xbp1           | 22433  |
| FGF19    | 9965 NM_005117  | 1 Fgf15          | 14170  |
| HIP1     | 3092 NM_005338  | 1                | 215114 |
| HKR3     | 3104 NM_005341  | 1 0610011D15Rik  | 100090 |
| HSPA5    | 3309 NM_005347  | 1 Hspa5          | 14828  |
| JUND     | 3727 NM_005354  | 1 Jund1          | 16478  |
| PCMT1    | 5110 NM_005389  | 1 Pcmt1          | 18537  |
| PODXL    | 5420 NM_005397  | 1 Podxl          | 27205  |
| P2RXL1   | 9127 NM_005446  | 1 P2rxl1         | 18440  |
| IDH3A    | 3419 NM_005530  | 1 Idh3a          | 67834  |
| NIT1     | 4817 NM_005600  | 1 Nit1           | 27045  |
| RHEB2    | 6009 NM_005614  | 1 Rheb           | 19744  |
| NR2F1    | 7025 NM_005654  | 1 Nr2f1          | 13865  |
| TIEG     | 7071 NM_005655  | 1 Tieg1          | 21847  |
| UFD1L    | 7353 NM_005659  | 1 Ufd1l          | 22230  |
| VDAC3    | 7419 NM_005662  | 1 Vdac3          | 22335  |
|          | 7905 NM_005669  | 1 Dp1            | 13476  |
| PQBP1    | 10084 NM_005710 | 1 Pqbp1          | 54633  |
| COL4A3BP | 10087 NM_005713 | 1 Col4a3bp       | 68018  |
|          | 10099 NM_005724 | 1 Tm4sf8-pending | 56434  |
| TFSM     | 10102 NM_005726 | 1 2310050B20Rik  | 66399  |
|          | 10106 NM_005730 | 1 D10Ertd73e     | 52468  |
| RAD50    | 10111 NM_005732 | 1 Rad50          | 19360  |
| TRIM28   | 10155 NM_005762 | 1 Trim28         | 21849  |
|          | 10174 NM_005775 | 1 Sh3d4          | 20410  |
| MPHOSPH6 | 10200 NM_005792 | 1 Mphosph6       | 68533  |
|          | 10210 NM_005802 | 1 AW105885       | 106021 |
|          | 10248 NM_005837 | 1 Rpp20-pending  | 74097  |
| MADH7    | 4092 NM_005904  | 1 Madh7          | 17131  |
| MFAP3    | 4238 NM_005927  | 1 2700079M14Rik  | 216760 |
| MMP11    | 4320 NM_005940  | 1 Mmp11          | 17385  |
| MTHFD1   | 4522 NM_005956  | 1 Mthfd1         | 108156 |
| SIAT8B   | 8128 NM_006011  | 1 Siat8b         | 20450  |
| CPNE6    | 9362 NM_006032  | 1 Cpne6          | 12891  |
| HS3ST3B1 | 9953 NM_006041  | 1 Hs3st3b        | 54710  |
| ZNFN1A1  | 10320 NM_006060 | 1 Znfn1a1        | 22778  |
| TFG      | 10342 NM_006070 | 1 Tfg            | 21787  |
| TOMM40   | 10452 NM_006114 | 1 Tomm40         | 53333  |

|          |                 |                 |        |
|----------|-----------------|-----------------|--------|
| MS4A3    | 932 NM_006138   | 1 Ms4a3         | 170813 |
| NCK1     | 4690 NM_006153  | 1 Nck1          | 17973  |
| NEDD8    | 4738 NM_006156  | 1 Nedd8         | 18002  |
| NFE2L2   | 4780 NM_006164  | 1 Nfe2l2        | 18024  |
| NTN2L    | 4917 NM_006181  | 1 Ntn3          | 18209  |
| TLN1     | 7094 NM_006289  | 1 Tln           | 21894  |
| XRCC1    | 7515 NM_006297  | 1 Xrcc1         | 22594  |
| NPEPPS   | 9520 NM_006310  | 1 Psa           | 19155  |
| FBLN5    | 10516 NM_006329 | 1 Fbln5         | 23876  |
| CAP2     | 10486 NM_006366 | 1 Cap2          | 67252  |
| APPBP2   | 10513 NM_006380 | 1 1300003O07Rik | 66884  |
|          | 10533 NM_006395 | 1 Apg7l         | 74244  |
|          | 10635 NM_006479 | 1 Rad51ap1      | 19362  |
| SLC2A1   | 6513 NM_006516  | 1 Slc2a1        | 20525  |
|          | 10926 NM_006716 | 1 Ask-pending   | 27214  |
| BTG2     | 7832 NM_006763  | 1 Btg2          | 12227  |
| EHD1     | 10938 NM_006795 | 1 Ehd1          | 13660  |
| STARD3   | 10948 NM_006804 | 1 Stard3        | 59045  |
| EBNA1BP2 | 10969 NM_006824 | 1 Ebna1bp2      | 69072  |
| SC5DL    | 6309 NM_006918  | 1 Sc5d          | 235293 |
| SIAT4B   | 6483 NM_006927  | 1 Siat5         | 20444  |
| SOX5     | 6660 NM_006940  | 1 Sox5          | 20678  |
| CLDN10   | 9071 NM_006984  | 1 Cldn10        | 58187  |
| TACC2    | 10579 NM_006997 | 1 Tacc2         | 57752  |
| ADAMTS5  | 11096 NM_007038 | 1 Adamts5       | 23794  |
| TFEB     | 7942 NM_007162  | 1 Tcfef         | 21425  |
| POMT1    | 10585 NM_007171 | 1 Pomt1         | 99011  |
| INSL6    | 11172 NM_007179 | 1 Insl6         | 27356  |
| BRD3     | 8019 NM_007371  | 1 Brd3          | 67382  |
| SIX6     | 4990 NM_007374  | 1 Six6          | 20476  |
| GRHPR    | 9380 NM_012203  | 1 Grhpr         | 76238  |
| LTB4DH   | 22949 NM_012212 | 1 Ltb4dh        | 67103  |
| NT5C2    | 22978 NM_012229 | 1 Nt5c2         | 76952  |
| SLC35A3  | 23443 NM_012243 | 1 Slc35a3       | 229782 |
|          | 22929 NM_012247 | 1 1110046B24Rik | 109079 |
| DNAJB5   | 25822 NM_012266 | 1 Dnajb5        | 56323  |
| AP2A2    | 161 NM_012305   | 1 Ap2a2         | 11772  |
| LSM4     | 25804 NM_012321 | 1 Lsm4          | 50783  |
| OSTF1    | 26578 NM_012383 | 1 Sh3d3         | 20409  |
| PFDN2    | 5202 NM_012394  | 1 Pfdn2         | 18637  |
| PITPNB   | 23760 NM_012399 | 1 Pitpnb        | 56305  |
| STAT5B   | 6777 NM_012448  | 1 Stat5b        | 20851  |
| TLL2     | 7093 NM_012465  | 1 Tll2          | 24087  |
| TRPC5    | 7224 NM_012471  | 1 Trpc5         | 22067  |
| SLC21A11 | 28232 NM_013272 | 1 Slc21a11      | 108116 |
| RACGAP1  | 29127 NM_013277 | 1 Racgap1       | 26934  |
|          | 29911 NM_013312 | 1 Hook2-pending | 170833 |
|          | 29933 NM_013345 | 1 G2a-pending   | 56696  |
| USP25    | 29761 NM_013396 | 1 Usp25         | 30940  |
| AK2      | 204 NM_013411   | 1 Ak2           | 11637  |
| NCF4     | 4689 NM_013416  | 1 Ncf4          | 17972  |
|          | 28972 NM_014041 | 1 1810004F21Rik | 69019  |

|         |                 |                  |        |
|---------|-----------------|------------------|--------|
| MRPL42  | 28977 NM_014050 | 1 2900055D03Rik  | 67270  |
|         | 28984 NM_014059 | 1 1190002H23Rik  | 66214  |
| PPP1R8  | 5511 NM_014110  | 1 6330548N22Rik  | 100336 |
| FXYD5   | 53827 NM_014164 | 1 Fxyd5          | 18301  |
|         | 29087 NM_014174 | 1 D730042P09Rik  | 77862  |
|         | 29100 NM_014187 | 1 1700006C06Rik  | 66320  |
| TMEM4   | 10330 NM_014255 | 1 Tmem4          | 56530  |
|         | 23474 NM_014297 | 1 0610025L15Rik  | 66071  |
| ORC6L   | 23594 NM_014321 | 1 Orc6l          | 56452  |
| SULT4A1 | 25830 NM_014351 | 1 Sult4a1        | 29859  |
| CYFIP2  | 26999 NM_014376 | 1 Cyfip2         | 76884  |
| ACAD8   | 27034 NM_014384 | 1 Acad8          | 66948  |
|         | 27042 NM_014388 | 1 AA408296       | 215193 |
| GHITM   | 27069 NM_014394 | 1 Ghitm          | 66092  |
|         | 30827 NM_014593 | 1 Cgbp-pending   | 74322  |
|         | 9644 NM_014631  | 1 Fish           | 14218  |
| ULK2    | 9706 NM_014683  | 1 Ulk2           | 29869  |
|         | 9748 NM_014720  | 1 Stk2           | 20874  |
| RNF144  | 9781 NM_014746  | 1 Rnf144         | 108089 |
| PTDSS1  | 9791 NM_014754  | 1 Ptdss1         | 19210  |
| TOMM70A | 9868 NM_014820  | 1 D16lum22e      | 28185  |
|         | 9896 NM_014845  | 1 A530089I17Rik  | 103199 |
| SRGAP2  | 9901 NM_014850  | 1 Srgap2         | 117601 |
|         | 23081 NM_015061 | 1 Gasc1-pending  | 76804  |
|         | 23090 NM_015069 | 1 Ebfaz          | 94187  |
| CIC     | 23152 NM_015125 | 1 Cic            | 71722  |
|         | 23301 NM_015252 | 1                | 216565 |
|         | 23376 NM_015323 | 1 1810074P20Rik  | 67490  |
| PANX1   | 24145 NM_015368 | 1 Panx1          | 55991  |
| NPDC1   | 56654 NM_015392 | 1 Npdc1          | 18146  |
|         | 25934 NM_015469 | 1 2700063N13Rik  | 66536  |
|         | 25937 NM_015472 | 1 2310058J06Rik  | 97064  |
| SIN3A   | 25942 NM_015477 | 1 Sin3a          | 20466  |
|         | 26012 NM_015537 | 1 Nelf           | 56876  |
|         | 26122 NM_015630 | 1 D2Ertd694e     | 227867 |
|         | 26151 NM_015654 | 1 1110028N05Rik  | 66176  |
|         | 27245 NM_015699 | 1                | 230793 |
|         | 27352 NM_015705 | 1 1810012I01Rik  | 105835 |
| GLTSCR2 | 29997 NM_015710 | 1 Gltscr2        | 68077  |
|         | 51068 NM_015938 | 1 C87860         | 97112  |
|         | 51605 NM_015939 | 1 CGI-09-pending | 66926  |
|         | 51001 NM_015942 | 1 2410017I18Rik  | 66410  |
|         | 51000 NM_015948 | 1 4921526O06Rik  | 108652 |
|         | 51099 NM_016006 | 1 1300003D03Rik  | 67469  |
|         | 51108 NM_016025 | 1 0610012D09Rik  | 59052  |
|         | 50999 NM_016040 | 1 3110020O18Rik  | 73130  |
|         | 51647 NM_016062 | 1 1110019N10Rik  | 68523  |
|         | 51029 NM_016076 | 1 5830417C01Rik  | 78825  |
|         | 51128 NM_016103 | 1 2310075M17Rik  | 66397  |
|         | 51390 NM_016108 | 1 1500031O19Rik  | 66253  |
| COQ7    | 10229 NM_016138 | 1 Coq7           | 12850  |
|         | 51409 NM_016173 | 1 2310008M14Rik  | 69536  |

|          |                 |                   |        |
|----------|-----------------|-------------------|--------|
| TRPC4    | 7223 NM_016179  | 1 Trpc4           | 22066  |
| TMEFF2   | 23671 NM_016192 | 1 Tmeff2          | 56363  |
|          | 51161 NM_016210 | 1 6430571L13Rik   | 235599 |
| POLK     | 51426 NM_016218 | 1 Polk            | 27015  |
| AK3L1    | 50808 NM_016282 | 1 Ak3l            | 56248  |
|          | 51185 NM_016302 | 1 AF229032        | 58799  |
| RHCG     | 51458 NM_016321 | 1 Rhcg            | 56315  |
| RAB14    | 51552 NM_016322 | 1 Rab14           | 68365  |
| IPO11    | 51194 NM_016338 | 1 2510001A17Rik   | 76582  |
|          | 51747 NM_016424 | 1 Luc7a-pending   | 67684  |
|          | 51225 NM_016428 | 1 2210414K06Rik   | 66610  |
|          | 51244 NM_016474 | 1 C130022K22Rik   | 232236 |
| GOLPH2   | 51280 NM_016548 | 1 Golph2          | 105348 |
| GMPR2    | 51292 NM_016576 | 1 5730544D12Rik   | 105446 |
| MRPL35   | 51318 NM_016622 | 1 Mrpl35          | 66223  |
| C21orf6  | 10069 NM_016940 | 1 ORF5            | 53858  |
| LDHC     | 3948 NM_017448  | 1 Ldh3            | 16833  |
|          | 54749 NM_017549 | 1 Epdm2-pending   | 105298 |
|          | 54802 NM_017646 | 1 lpt-pending     | 66966  |
|          | 54808 NM_017653 | 1 4933427L07Rik   | 69190  |
|          | 54810 NM_017655 | 1 Semcap2-pending | 54120  |
| TRPM7    | 54822 NM_017672 | 1 Trpm7           | 58800  |
|          | 54858 NM_017712 | 1 2810003H13Rik   | 66522  |
|          | 54908 NM_017785 | 1 2600001J17Rik   | 70385  |
|          | 54922 NM_017805 | 1 2610025P08Rik   | 69903  |
|          | 54923 NM_017806 | 1 2810038K19Rik   | 72699  |
| C21orf55 | 54943 NM_017833 | 1 ORF28           | 246738 |
|          | 54962 NM_017858 | 1 1110005A05Rik   | 66131  |
|          | 54970 NM_017868 | 1 E330017O07Rik   | 235330 |
|          | 54981 NM_017881 | 1                 | 225994 |
|          | 55039 NM_017956 | 1 4632406N01Rik   | 68260  |
| ESRRBL1  | 55081 NM_018010 | 1 Esrrbl1         | 73916  |
| WBSCR20A | 55695 NM_018044 | 1 9830109N13Rik   | 100609 |
|          | 55122 NM_018064 | 1                 | 67185  |
| PIWIL2   | 55124 NM_018068 | 1 Piwil2          | 57746  |
|          | 55702 NM_018074 | 1 2900016D05Rik   | 72886  |
|          | 55131 NM_018077 | 1 2810480G15Rik   | 68272  |
|          | 55709 NM_018095 | 1 2510026C23Rik   | 67136  |
|          | 55718 NM_018119 | 1 Sin             | 26939  |
|          | 55175 NM_018143 | 1                 | 217194 |
|          | 55191 NM_018161 | 1 Nadsyn1-pending | 78914  |
|          | 55192 NM_018163 | 1 1700025B16Rik   | 69408  |
|          | 55735 NM_018198 | 1 E030019A03Rik   | 230935 |
|          | 55739 NM_018210 | 1 2810407E01Rik   | 69225  |
|          | 55222 NM_018239 | 1                 | 216011 |
| C6orf67  | 55754 NM_018247 | 1 2010200I23Rik   | 69981  |
|          | 55256 NM_018269 | 1 AL024210        | 104923 |
| C11orf23 | 55291 NM_018312 | 1 D19Ertd703e     | 52036  |
| C20orf29 | 55317 NM_018347 | 1 2310035K24Rik   | 69596  |
|          | 54664 NM_018374 | 1 2310036D22Rik   | 71900  |
| CENTA2   | 55803 NM_018404 | 1                 | 216991 |
| C14orf11 | 55837 NM_018453 | 1 1810011O16Rik   | 66266  |

|           |                 |                 |        |
|-----------|-----------------|-----------------|--------|
|           | 55840 NM_018456 | 1 AW048865      | 106389 |
|           | 55374 NM_018502 | 1 2410015B03Rik | 71983  |
|           | 55379 NM_018509 | 1 AA959742      | 98238  |
| C5orf3    | 10827 NM_018691 | 1 9030624B09Rik | 67726  |
| NXT2      | 55916 NM_018698 | 1 6330587F24Rik | 237082 |
|           | 55523 NM_018702 | 1 Adar3-pending | 94191  |
| WDR9      | 54014 NM_018963 | 1 Wdr9          | 93871  |
| SNTG1     | 54212 NM_018967 | 1 Sntg1         | 71096  |
| FBXW5     | 54461 NM_018998 | 1 Fbxw5         | 30839  |
|           | 54502 NM_019027 | 1 BC013481      | 245945 |
|           | 54520 NM_019044 | 1 4633402D15Rik | 70829  |
|           | 56257 NM_019606 | 1               | 231803 |
| HTR7      | 3363 NM_019860  | 1 Htr7          | 15566  |
| SARA1     | 56681 NM_020150 | 1 Sara          | 20224  |
| MCCC1     | 56922 NM_020166 | 1 Mccc1         | 72039  |
| DUSP22    | 56940 NM_020185 | 1 Dusp22        | 105352 |
|           | 56949 NM_020196 | 1 0610041O14Rik | 67439  |
|           | 56954 NM_020202 | 1 D16Ertd502e   | 52633  |
| CCNL1     | 57018 NM_020307 | 1 Ccnl          | 56706  |
| AVEN      | 57099 NM_020371 | 1 1700056A21Rik | 74268  |
| C20orf3   | 57136 NM_020531 | 1 2310001A20Rik | 71881  |
| WDFY1     | 57590 NM_020830 | 1 Wdfy1         | 69368  |
|           | 57592 NM_020832 | 1 4931408L03Rik | 78266  |
| CPNE5     | 57699 NM_020939 | 1 Cpne5         | 240058 |
| KRTHA4    | 3885 NM_021013  | 1 Krt1-4        | 16672  |
| DMTF1     | 9988 NM_021145  | 1 Dmtf1         | 23857  |
| SF4       | 57794 NM_021164 | 1 Sf4           | 70616  |
| PROK2     | 60675 NM_021935 | 1 Prok2         | 50501  |
|           | 63906 NM_022078 | 1 D930035B09Rik | 242691 |
| C20orf67  | 63935 NM_022104 | 1 F730014I05Rik | 228866 |
| C11orf24  | 53838 NM_022338 | 1 1810055G02Rik | 72056  |
|           | 64376 NM_022466 | 1 2610034F18Rik | 67143  |
| ZDHHC6    | 64429 NM_022494 | 1 Zdhhc6        | 66980  |
|           | 64778 NM_022763 | 1 1600019O04Rik | 72007  |
|           | 64789 NM_022774 | 1 3110037I16Rik | 73172  |
|           | 64800 NM_022785 | 1 4931407K02Rik | 77627  |
|           | 64866 NM_022842 | 1 E030027H19Rik | 109332 |
| CAPN10    | 11132 NM_023083 | 1 Capn10        | 23830  |
| C14orf137 | 78990 NM_023112 | 1 4930586I02Rik | 68149  |
|           | 65990 NM_023933 | 1 BC008155      | 214917 |
| MRP63     | 78988 NM_024026 | 1 Mrp63         | 67840  |
|           | 79007 NM_024043 | 1 2810427I04Rik | 72185  |
|           | 79009 NM_024045 | 1 Ddx50         | 94213  |
|           | 79073 NM_024092 | 1 1110006I15Rik | 68539  |
|           | 79585 NM_024535 | 1 0610011B16Rik | 78885  |
|           | 79603 NM_024552 | 1 2900019C14Rik | 67260  |
| CHD1L     | 9557 NM_024568  | 1 Chd1l         | 68058  |
|           | 79657 NM_024604 | 1 2310042P20Rik | 71919  |
|           | 79705 NM_024652 | 1 AW319595      | 233328 |
|           | 79752 NM_024699 | 1 2310008M20Rik | 66361  |
| GEMIN7    | 79760 NM_024707 | 1 Gemin7        | 69731  |
|           | 79791 NM_024735 | 1 2310046N15Rik | 76454  |



|           |                 |                    |        |
|-----------|-----------------|--------------------|--------|
|           | 79798 NM_024742 | 1 BC032200         | 233912 |
|           | 79811 NM_024755 | 1 5730555F13Rik    | 66660  |
|           | 79816 NM_024760 | 1 Tle6             | 114606 |
|           | 79869 NM_024811 | 1 5730453I16Rik    | 269061 |
|           | 79886 NM_024828 | 1 5830433M19Rik    | 67770  |
|           | 79888 NM_024830 | 1 BC005662         | 210992 |
|           | 79932 NM_024874 | 1 AU040320         | 100317 |
|           | 79977 NM_024915 | 1 Grhl2-pending    | 252973 |
| RNF34     | 80196 NM_025126 | 1 Rnf34            | 80751  |
|           | 80255 NM_025181 | 1 1300003P13Rik    | 74150  |
| NDEL1     | 81565 NM_030808 | 1 Ndel1            | 83431  |
| TRIM8     | 81603 NM_030912 | 1 Trim8            | 93679  |
|           | 81671 NM_030938 | 1 4930579A11Rik    | 75909  |
|           | 81855 NM_030971 | 1 Sfxn3            | 94280  |
| CABP1     | 9478 NM_031205  | 1 Cabp1            | 29867  |
| TCF7L1    | 83439 NM_031283 | 1 Tcf3             | 21415  |
| GNGT2     | 2793 NM_031498  | 1 Gngt2            | 14710  |
| SEMA6B    | 10501 NM_032108 | 1 Sema6b           | 20359  |
|           | 84060 NM_032120 | 1 C030048B08Rik    | 269623 |
|           | 84063 NM_032123 | 1 C330019F22Rik    | 243911 |
| ZIC4      | 84107 NM_032153 | 1 Zic4             | 22774  |
|           | 85301 NM_032161 | 1 5730512J02Rik    | 66652  |
| PPP1R1B   | 84152 NM_032192 | 1 Ppp1r1b          | 19049  |
|           | 84221 NM_032261 | 1 1700027D21Rik    | 76573  |
|           | 84240 NM_032280 | 1 1810019C21Rik    | 69085  |
|           | 84251 NM_032291 | 1 3110007P09Rik    | 73094  |
|           | 84303 NM_032343 | 1 0710001P09Rik    | 66098  |
|           | 84324 NM_032364 | 1 5730551F12Rik    | 74330  |
| C20orf154 | 84515 NM_032485 | 1 5730432L01Rik    | 66634  |
|           | 84516 NM_032486 | 1 Dctn5            | 59288  |
|           | 84620 NM_032528 | 1 ST6GallI-pending | 240119 |
| C22orf23  | 84645 NM_032561 | 1 1700088E04Rik    | 27660  |
| DGAT2     | 84649 NM_032564 | 1 Dgat2            | 67800  |
|           | 51550 NM_032630 | 1 2810452K22Rik    | 67236  |
| BSCL2     | 26580 NM_032667 | 1 Gng3lg           | 14705  |
|           | 84817 NM_032731 | 1 D11Ertd672e      | 52700  |
|           | 84858 NM_032772 | 1 B830002A16Rik    | 218820 |
|           | 84872 NM_032786 | 1 AI790326         | 103284 |
|           | 84934 NM_032848 | 1 1110008J03Rik    | 100764 |
| ZFYVE19   | 84936 NM_032850 | 1 1500041L05Rik    | 72008  |
|           | 85027 NM_032947 | 1 AI195350         | 106878 |
| WBSCR14   | 51085 NM_032953 | 1 Wbscr14          | 58805  |
| GTF2I     | 2969 NM_033000  | 1 Gtf2i            | 14886  |
| AXUD1     | 64651 NM_033027 | 1 Axud1            | 215418 |
| LMLN      | 89782 NM_033029 | 1 5330415H22Rik    | 239833 |
| CECR5     | 27440 NM_033070 | 1                  | 214932 |
| NKD2      | 85409 NM_033120 | 1 Nkd2             | 72293  |
| WNT3A     | 89780 NM_033131 | 1 Wnt3a            | 22416  |
| HYAL2     | 8692 NM_033158  | 1 Hyal2            | 15587  |
| C20orf114 | 92747 NM_033197 | 1                  | 228801 |
| TMEM10    | 93377 NM_033207 | 1 Tmem10           | 226115 |
| PURB      | 5814 NM_033224  | 1 Purb             | 19291  |

|           |                  |                   |        |
|-----------|------------------|-------------------|--------|
| CDC14B    | 8555 NM_033331   | 1 A530086E13Rik   | 218294 |
| TNFRSF13C | 115650 NM_052945 | 1 Tnfrsf13c       | 72049  |
| KLHDC3    | 116138 NM_057161 | 1 Klhdc3          | 71765  |
| C21orf70  | 85395 NM_058190  | 1 1810008A18Rik   | 108707 |
| VIAAT     | 140679 NM_080552 | 1 Viaat           | 22348  |
|           | 113235 NM_080669 | 1 D11Ertd18e      | 52466  |
| PTPRU     | 10076 NM_133177  | 1 Ptpri           | 19273  |
|           | 115752 NM_133375 | 1 AV340375        | 213550 |
|           | 135228 NM_133493 | 1 9930012E15Rik   | 235505 |
| CYGB      | 114757 NM_134268 | 1 Cygb            | 114886 |
| GPSN2     | 9524 NM_138501   | 1 Gpsn2           | 106529 |
|           | 92715 NM_138778  | 1 2810443J12Rik   | 67228  |
| MAPK14    | 1432 NM_139012   | 1 Mapk14          | 26416  |
| DPP9      | 91039 NM_139159  | 1 6430584G11Rik   | 224897 |
|           | 221955 NM_139179 | 1 E330036I19Rik   | 231871 |
| SYNPR     | 132204 NM_144642 | 1 Synpr           | 72003  |
| CRYGN     | 155051 NM_144727 | 1 Crygn           | 214301 |
| APOA1BP   | 128240 NM_144772 | 1 Apoa1bp         | 246703 |
|           | 201254 NM_144998 | 1 Stra13          | 20892  |
|           | 203102 NM_145004 | 1 Adam35-pending  | 353188 |
|           | 165679 NM_145035 | 1 1110032A04Rik   | 66183  |
| VTI1A     | 143187 NM_145206 | 1 Vti1a           | 53611  |
| TRIM11    | 81559 NM_145214  | 1 Trim11          | 94091  |
|           | 127255 NM_145258 | 1 4933403H06Rik   | 74435  |
|           | 159090 NM_145284 | 1 4632404H22Rik   | 78755  |
| ISL2      | 64843 NM_145805  | 1 Isl2            | 104360 |
| ZNF38     | 7589 NM_145914   | 1 Zipro1          | 22697  |
|           | 91012 NM_147190  | 1 2310081H14Rik   | 71949  |
|           | 92421 NM_152284  | 1 2310010I16Rik   | 66371  |
|           | 155368 NM_152559 | 1 Wbscr27-pending | 79565  |
|           | 163859 NM_152608 | 1                 | 208768 |
|           | 166929 NM_152621 | 1 4933405A16Rik   | 74442  |
| ITM1      | 3703 NM_152713   | 1 Itm1            | 16430  |
| MRPS18AL1 | 221421 NM_152732 | 1 1700027N10Rik   | 75564  |
|           | 222166 NM_152793 | 1 2410066E13Rik   | 68235  |
|           | 115426 NM_152896 | 1 Nirf-pending    | 109113 |
|           | 256302 NM_152914 | 1 Gtlf3b          | 24083  |
| ABHD2     | 11057 NM_152924  | 1 Abhd2           | 54608  |
| MCOLN2    | 255231 NM_153259 | 1 Mcoln2          | 68279  |
|           | 90459 NM_153332  | 1 3110010F15Rik   | 67276  |
| GPR26     | 2849 NM_153442   | 1 Gpr26           | 233919 |
| EVC       | 2121 NM_153717   | 1 Evc             | 59056  |
| TRIM35    | 23087 NM_171982  | 1 0710005M05Rik   | 66854  |
| CAMKK1    | 84254 NM_172206  | 1 Camkk1          | 55984  |
| SCUBE1    | 80274 NM_173050  | 1 Scube1          | 64706  |
|           | 285971 NM_173680 | 1                 | 243372 |
| BBS7      | 55212 NM_176824  | 1 8430406N16Rik   | 71492  |
| FGFR3     | 2261 NM_000142   | 1 Fgfr3           | 14184  |
| KRT17     | 3872 NM_000422   | 1 Krt1-17         | 16667  |
| PMS1      | 5378 NM_000534   | 1                 | 227099 |
| ALDH1B1   | 219 NM_000692    | 1 Aldh1b1         | 72535  |
| BLVRB     | 645 NM_000713    | 1 Blvrbr          | 233016 |

|          |                 |                  |        |
|----------|-----------------|------------------|--------|
| GRIN2A   | 2903 NM_000833  | 1 Grin2a         | 14811  |
| PDE1B    | 5153 NM_000924  | 1 Pde1b          | 18574  |
| DSCAM    | 1826 NM_001389  | 1 Dscam          | 13508  |
| BRF1     | 2972 NM_001519  | 1 Brf1           | 72308  |
| ATF4     | 468 NM_001675   | 1 Atf4           | 11911  |
| CD63     | 967 NM_001780   | 1 Cd63           | 12512  |
| ISL1     | 3670 NM_002202  | 1 Isl1           | 16392  |
| ITIH1    | 3697 NM_002215  | 1 Itih1          | 16424  |
| MC1R     | 4157 NM_002386  | 1 Mc1r           | 17199  |
| NPM1     | 4869 NM_002520  | 1 Npm1           | 18148  |
| NPTX1    | 4884 NM_002522  | 1 Nptx1          | 18164  |
| PFKL     | 5211 NM_002626  | 1 Pflkl          | 18641  |
| PFKP     | 5214 NM_002627  | 1 Pfkp           | 56421  |
| PRKCI    | 5584 NM_002740  | 1 Prkcl          | 18759  |
| PYGB     | 5834 NM_002862  | 1 Pygb           | 110078 |
| RFC4     | 5984 NM_002916  | 1 AU040575       | 106344 |
| SDHD     | 6392 NM_003002  | 1 3110001M13Rik  | 66925  |
| SSR1     | 6745 NM_003144  | 1 Ssr1           | 107513 |
| SYT5     | 6861 NM_003180  | 1 Syt5           | 53420  |
| TGFB2    | 7042 NM_003238  | 1 Tgfb2          | 21808  |
| UGDH     | 7358 NM_003359  | 1 Ugdh           | 22235  |
| WNT9A    | 7483 NM_003395  | 1 Wnt9a          | 216795 |
| YY1      | 7528 NM_003403  | 1 Yy1            | 22632  |
| CDC45L   | 8318 NM_003504  | 1 Cdc45l         | 12544  |
| EIF3S2   | 8668 NM_003757  | 1 Eif3s2         | 54709  |
| DLK1     | 8788 NM_003836  | 1 Dlk1           | 13386  |
| CREG     | 8804 NM_003851  | 1 Creg           | 23850  |
| FUBP1    | 8880 NM_003902  | 1 D3Ertd330e     | 51886  |
| RPS6KA4  | 8986 NM_003942  | 1 Rps6ka4        | 56613  |
| STOM     | 2040 NM_004099  | 1 Epb7.2         | 13830  |
|          | 9088 NM_004203  | 1 Pkmyt1-pending | 268930 |
| DAP      | 1611 NM_004394  | 1                | 223453 |
| FGF5     | 2250 NM_004464  | 1 Fgf5           | 14176  |
| TCF15    | 6939 NM_004609  | 1 Tcf15          | 21407  |
| RASAL1   | 8437 NM_004658  | 1 Rasal1         | 19415  |
| ATP6V0D1 | 9114 NM_004691  | 1 Atp6v0d1       | 11972  |
| TXNL     | 9352 NM_004786  | 1 Txnl           | 53382  |
| STX8     | 9482 NM_004853  | 1 Stx8           | 55943  |
| BCL3     | 602 NM_005178   | 1 Bcl3           | 12051  |
| EMS1     | 2017 NM_005231  | 1 Ctnn           | 13043  |
| EWSR1    | 2130 NM_005243  | 1 Ewsh           | 14030  |
| GDF8     | 2660 NM_005259  | 1 Gdf8           | 17700  |
| FRAT1    | 10023 NM_005479 | 1 Frat1          | 14296  |
| INPP5D   | 3635 NM_005541  | 1 Inpp5d         | 16331  |
| DLL1     | 28514 NM_005618 | 1 Dll1           | 13388  |
| PDCD7    | 10081 NM_005707 | 1 Pcd7           | 50996  |
|          | 10146 NM_005754 | 1 G3bp-pending   | 27041  |
| PRDX2    | 7001 NM_005809  | 1 Prdx2          | 21672  |
|          | 10289 NM_005875 | 1 Gc20-pending   | 68969  |
| MAN1A1   | 4121 NM_005907  | 1 Man1a          | 17155  |
| MEF2D    | 4209 NM_005920  | 1 Mef2d          | 17261  |
| MTHFR    | 4524 NM_005957  | 1 Mthfr          | 17769  |

|         |                  |                    |        |
|---------|------------------|--------------------|--------|
| PCTK1   | 5127 NM_006201   | 1 Pctk1            | 18555  |
|         | 10550 NM_006407  | 1 Arl6ip5          | 65106  |
| MCAM    | 4162 NM_006500   | 1 Mcam             | 84004  |
| TUBGCP2 | 10844 NM_006659  | 1 Tubgcp2          | 74237  |
| HOXA2   | 3199 NM_006735   | 1 Hoxa2            | 15399  |
| MALT1   | 10892 NM_006785  | 1 D430033E09Rik    | 240354 |
| PSMF1   | 9491 NM_006814   | 1 Psmf1            | 228769 |
| SMT3H1  | 6612 NM_006936   | 1 Smt3h1           | 20610  |
| LECT1   | 11061 NM_007015  | 1 Lect1            | 16840  |
| EVER1   | 11322 NM_007267  | 1 D11Ertd204e      | 217353 |
| FBXL4   | 26235 NM_012160  | 1 A1836810         | 269514 |
| PTRF    | 284119 NM_012232 | 1 Ptrf             | 19285  |
| TIMM8B  | 26521 NM_012459  | 1 Timm8b           | 30057  |
| USP21   | 27005 NM_012475  | 1 Usp21            | 30941  |
| YWHAG   | 7532 NM_012479   | 1 Ywhag            | 22628  |
| TIMM22  | 29928 NM_013337  | 1 Timm22           | 56322  |
|         | 29880 NM_013338  | 1 Alg5-pending     | 66248  |
|         | 28992 NM_014067  | 1 D930010J01Rik    | 107227 |
| PGA5    | 5222 NM_014224   | 1 Pepf-pending     | 58803  |
| RAGE    | 5891 NM_014226   | 1 Rage             | 26448  |
| HABP4   | 22927 NM_014282  | 1 Habp4            | 56541  |
|         | 27089 NM_014402  | 1 Qpc-pending      | 22272  |
| ERO1L   | 30001 NM_014584  | 1 Ero1l            | 50527  |
|         | 9760 NM_014729   | 1 Tox              | 252838 |
|         | 9774 NM_014739   | 1 2700025J07Rik    | 72567  |
|         | 23155 NM_015127  | 1 Mcll-pending     | 229725 |
| PTDSR   | 23210 NM_015167  | 1 Ptdsr            | 107817 |
| GADD45B | 4616 NM_015675   | 1 Gadd45b          | 17873  |
| HEBP1   | 50865 NM_015987  | 1 Hebp1            | 15199  |
| REV1L   | 51455 NM_016316  | 1 Rev1l            | 56210  |
|         | 51240 NM_016467  | 1 C730042F17Rik    | 227102 |
|         | 51286 NM_016564  | 1 Bm88-pending     | 57754  |
|         | 53358 NM_016848  | 1 Shc3             | 20418  |
|         | 55596 NM_017612  | 1 5730565F05Rik    | 70650  |
| LRP1B   | 53353 NM_018557  | 1 Lrp1b            | 94217  |
|         | 55454 NM_018590  | 1 Galnact2-pending | 78752  |
|         | 56063 NM_019118  | 1 2510006D16Rik    | 76799  |
| CHST7   | 56548 NM_019886  | 1 Chst7            | 60322  |
| C13orf1 | 57213 NM_020456  | 1 6330409N04Rik    | 66674  |
| NR2F2   | 7026 NM_021005   | 1 Nr2f2            | 11819  |
| MPST    | 4357 NM_021126   | 1 Mpst             | 246221 |
|         | 60370 NM_021732  | 1 2310008N12Rik    | 69534  |
|         | 60481 NM_021814  | 1 Helo1-pending    | 68801  |
| DMRT1   | 1761 NM_021951   | 1 Dmrt1            | 50796  |
| ZNF148  | 7707 NM_021964   | 1 Zfp148           | 22661  |
| GALNT11 | 63917 NM_022087  | 1 E430002F06Rik    | 231050 |
|         | 65220 NM_023018  | 1 BC004012         | 192185 |
| MRPL34  | 64981 NM_023937  | 1 Mrpl34           | 94065  |
| HOXB4   | 3214 NM_024015   | 1 Hoxb4            | 15412  |
|         | 79018 NM_024052  | 1 4933439F18Rik    | 66771  |
|         | 79170 NM_024320  | 1 BC022765         | 217138 |
|         | 79668 NM_024615  | 1 D13Ertd275e      | 52552  |

|          |                  |                 |        |
|----------|------------------|-----------------|--------|
|          | 79759 NM_024706  | 1 E130018B19Rik | 244219 |
| CLMN     | 79789 NM_024734  | 1 Clmn          | 94040  |
|          | 79903 NM_024845  | 1 1200013P24Rik | 74763  |
|          | 80235 NM_025163  | 1 F630022B06Rik | 239827 |
|          | 81606 NM_030915  | 1 Lbh-pending   | 77889  |
|          | 83874 NM_031937  | 1 A1447804      | 103724 |
|          | 84193 NM_032233  | 1 D12Ertd771e   | 52690  |
| PTPN5    | 84867 NM_032781  | 1 Ptpn5         | 19259  |
| CASP2    | 835 NM_032982    | 1 Casp2         | 12366  |
| PPP1R14A | 94274 NM_033256  | 1 Ppp1r14a      | 68458  |
| STK22C   | 81629 NM_052841  | 1 Stk22d        | 117545 |
| TSGA2    | 89765 NM_080860  | 1 Tsga2         | 22092  |
| PLCD3    | 113026 NM_133373 | 1 2610205J15Rik | 72469  |
| ARHV     | 171177 NM_133639 | 1 Arhv          | 228543 |
|          | 113444 NM_138428 | 1 BC003266      | 80284  |
|          | 90332 NM_138568  | 1 4933417E01Rik | 74463  |
|          | 146845 NM_145054 | 1 1700019F09Rik | 71860  |
| SPESP1   | 246777 NM_145658 | 1 4921508E09Rik | 66712  |
| ATPAF2   | 91647 NM_145691  | 1 Atpaf2        | 246782 |
|          | 124222 NM_152341 | 1 1500004C10Rik | 76498  |
|          | 152273 NM_152536 | 1 C330025N11Rik | 232237 |
|          | 166614 NM_152619 | 1 6330415M09Rik | 70762  |
|          | 222223 NM_152748 | 1 9330182L06Rik | 231014 |
| EED      | 8726 NM_152991   | 1 Eed           | 13626  |
|          | 254427 NM_153256 | 1 5430407P10Rik | 227545 |
|          | 162515 NM_153357 | 1               | 216867 |
|          | 124872 NM_153446 | 1 Galgt2        | 14422  |
|          | 283820 NM_173614 | 1 Pm5-pending   | 211548 |
| ALDH9A1  | 223 NM_000696    | 1 Aldh9a1       | 56752  |
| POLR2B   | 5431 NM_000938   | 1               | 231329 |
| IGFBP7   | 3490 NM_001553   | 1 Igfbp7        | 29817  |
| NFX1     | 4799 NM_002504   | 1 Nfx1          | 74164  |
| PTPRZ1   | 5803 NM_002851   | 1 Ptprz1        | 19283  |
| RASGRF1  | 5923 NM_002891   | 1 Rasgrf1       | 19417  |
| SLC22A4  | 6583 NM_003059   | 1 Slc22a4       | 30805  |
| SPINT1   | 6692 NM_003710   | 1 Spint1        | 20732  |
| ADAM23   | 8745 NM_003812   | 1 Adam23        | 23792  |
| CITED1   | 4435 NM_004143   | 1 Cited1        | 12705  |
| ELAVL2   | 1993 NM_004432   | 1 Elavl2        | 15569  |
| FOXG1B   | 2290 NM_005249   | 1 Foxg1         | 15228  |
| MADH3    | 4088 NM_005902   | 1 Madh3         | 17127  |
| TBCD     | 6904 NM_005993   | 1 Tbcd          | 108903 |
| CAPZA2   | 830 NM_006136    | 1 Capza2        | 12343  |
|          | 9908 NM_012297   | 1 G3bp2-pending | 23881  |
| MMD      | 23531 NM_012329  | 1 Mmd           | 67468  |
|          | 29902 NM_013300  | 1 1500011H22Rik | 68948  |
| KCNK2    | 3776 NM_014217   | 1 Kcnk2         | 16526  |
| HERPUD1  | 9709 NM_014685   | 1 Herpud1       | 64209  |
|          | 26010 NM_015535  | 1 2810022L02Rik | 67198  |
| WDR21    | 26094 NM_015604  | 1 1110018E21Rik | 73828  |
|          | 51639 NM_016047  | 1 0610009D07Rik | 66055  |
|          | 51184 NM_016301  | 1 A930018B01Rik | 68080  |

|          |                  |                 |        |
|----------|------------------|-----------------|--------|
| KLF3     | 51274 NM_016531  | 1 Klf3          | 16599  |
|          | 54815 NM_017660  | 1 BC031407      | 234366 |
| FBXO6    | 26270 NM_018438  | 1 Fbxo6b        | 50762  |
| MRPS21   | 54460 NM_018997  | 1 Mrps21        | 66292  |
| C11orf14 | 56675 NM_020645  | 1 A330103B05Rik | 78593  |
|          | 79831 NM_024773  | 1 3110005O21Rik | 77035  |
|          | 89978 NM_080650  | 1 5730421E18Rik | 66632  |
|          | 115817 NM_138452 | 1 D14Ertd484e   | 52585  |
|          | 124359 NM_152342 | 1 4930453I21Rik | 75796  |
|          | 144577 NM_152440 | 1               | 270802 |
|          | 286183 NM_173688 | 1 E130310K16Rik | 269513 |
| C14orf21 | 161424 NM_174913 | 1 2610027L16Rik | 67842  |
| CSNK1A1  | 1452 NM_001892   | 1 Csnk1a1       | 93687  |
| VLDLR    | 7436 NM_003383   | 1 Vldlr         | 22359  |
| ANP32A   | 8125 NM_006305   | 1 Anp32a        | 11737  |
| ATP12A   | 479 NM_001676    | 1 Atp12a        | 192113 |
| SNX9     | 51429 NM_016224  | 1 Snx9          | 66616  |
| MRPL14   | 64928 NM_032111  | 1 1110006I11Rik | 68463  |
| PDE8B    | 8622 NM_003719   | 1 B230331L10Rik | 218461 |
| AGXT     | 189 NM_000030    | 2 Agxt          | 11611  |
| ARG1     | 383 NM_000045    | 2 Arg1          | 11846  |
| LIPC     | 3990 NM_000236   | 2 Lipc          | 15450  |
| PROC     | 5624 NM_000312   | 2 Proc          | 19123  |
| QDPR     | 5860 NM_000320   | 2 Qdpr          | 110391 |
| NR0B1    | 190 NM_000475    | 2 Nr0b1         | 11614  |
| CACNA2D1 | 781 NM_000722    | 2 Cacna2d1      | 12293  |
| CHRNA4   | 1137 NM_000744   | 2 Chrna4        | 11438  |
| CYP26A1  | 1592 NM_000783   | 2 Cyp26a1       | 13082  |
| RPS10    | 6204 NM_001014   | 2 2210402A09Rik | 67097  |
| C1QBP    | 708 NM_001212    | 2 C1qbp         | 12261  |
| CDS1     | 1040 NM_001263   | 2 Cds1          | 74596  |
| CHGA     | 1113 NM_001275   | 2 Chga          | 12652  |
| EIF4G2   | 1982 NM_001418   | 2 Eif4g2        | 13690  |
| G22P1    | 2547 NM_001469   | 2 G22p1         | 14375  |
| HRMT1L1  | 3275 NM_001535   | 2 Hrmt1l1       | 15468  |
| IFRD1    | 3475 NM_001550   | 2 Ifrd1         | 15982  |
| APOC1    | 341 NM_001645    | 2 Apoc1         | 11812  |
| CD47     | 961 NM_001777    | 2 Cd47          | 16423  |
| CTPS     | 1503 NM_001905   | 2 Ctps          | 51797  |
| CYB5     | 1528 NM_001914   | 2 Cyb5          | 109672 |
| EDN2     | 1907 NM_001956   | 2 Edn2          | 13615  |
| EPB49    | 2039 NM_001978   | 2 Epb4.9        | 13829  |
| F3       | 2152 NM_001993   | 2 F3            | 14066  |
| FOXO1A   | 2308 NM_002015   | 2 Foxo1         | 56458  |
| IRF1     | 3659 NM_002198   | 2 Irf1          | 16362  |
| LY6H     | 4062 NM_002347   | 2 Ly6h          | 23934  |
| MMP15    | 4324 NM_002428   | 2 Mmp15         | 17388  |
| NPAS2    | 4862 NM_002518   | 2 Npas2         | 18143  |
| NTRK3    | 4916 NM_002530   | 2 Ntrk3         | 18213  |
| NTSR1    | 4923 NM_002531   | 2 Ntsr          | 18216  |
| PRPS2    | 5634 NM_002765   | 2 Prps2         | 110639 |
| SLC4A2   | 6522 NM_003040   | 2 Slc4a2        | 20535  |

|         |                 |                 |        |
|---------|-----------------|-----------------|--------|
| SQLE    | 6713 NM_003129  | 2 Sqle          | 20775  |
| TCEB3   | 6924 NM_003198  | 2 Tceb3         | 27224  |
| NFE2L1  | 4779 NM_003204  | 2 Nfe2l1        | 18023  |
| TNNC1   | 7134 NM_003280  | 2 Tncc          | 21924  |
| USP1    | 7398 NM_003368  | 2 Usp1          | 230484 |
| VDAC1   | 7416 NM_003374  | 2 Vdac1         | 22333  |
| WNT5A   | 7474 NM_003392  | 2 Wnt5a         | 22418  |
| STAM    | 8027 NM_003473  | 2 Stam          | 20844  |
| ADAM12  | 8038 NM_003474  | 2 Adam12        | 11489  |
| MADD    | 8567 NM_003682  | 2 Madd          | 228355 |
| DNCL1   | 8655 NM_003746  | 2 Dncl1         | 56455  |
| MBTPS1  | 8720 NM_003791  | 2 Mbtps1        | 56453  |
| SNX4    | 8723 NM_003794  | 2 Snx4          | 69150  |
| AMPD2   | 271 NM_004037   | 2 Ampd2         | 109674 |
| CRYBB3  | 1417 NM_004076  | 2 Crybb3        | 12962  |
| HNRPU   | 3192 NM_004501  | 2 Hnrpu         | 51810  |
| NDUFA3  | 4696 NM_004542  | 2 Ndufa3        | 66091  |
| SMS     | 6611 NM_004595  | 2 Sms           | 20603  |
| SNRPA   | 6626 NM_004596  | 2 Snrpa         | 53607  |
| USP9X   | 8239 NM_004652  | 2 Usp9x         | 22284  |
| LRAT    | 9227 NM_004744  | 2 Lrat          | 79235  |
| BRE     | 9577 NM_004899  | 2 Bre           | 107976 |
| GOLGA5  | 9950 NM_005113  | 2 Golga5        | 27277  |
| THOC1   | 9984 NM_005131  | 2 Thoc1         | 225160 |
| FGR     | 2268 NM_005248  | 2 Fgr           | 14191  |
| GFER    | 2671 NM_005262  | 2 Gfer          | 11692  |
| NKTR    | 4820 NM_005385  | 2 Nktr          | 18087  |
| KIFC3   | 3801 NM_005550  | 2 Kifc3         | 16582  |
| AKAP8   | 10270 NM_005858 | 2 Akap8         | 56399  |
| MCM7    | 4176 NM_005916  | 2 Mcmd7         | 17220  |
| MTF1    | 4520 NM_005955  | 2 Mtf1          | 17764  |
| NOC4    | 10328 NM_006067 | 2 Noc4          | 18117  |
| VAV3    | 10451 NM_006113 | 2 Vav3          | 57257  |
| TYRO3   | 7301 NM_006293  | 2 Tyro3         | 22174  |
| STK25   | 10494 NM_006374 | 2 Stk25         | 59041  |
| DPYSL4  | 10570 NM_006426 | 2 Dpysl4        | 26757  |
|         | 10630 NM_006474 | 2 Gp38          | 14726  |
| TXNL2   | 10539 NM_006541 | 2 Txnl2         | 30926  |
| SDCCAG3 | 10807 NM_006643 | 2 C330016H24Rik | 68112  |
| NUDT3   | 11165 NM_006703 | 2 Nudt3         | 56409  |
| ADK     | 132 NM_006721   | 2 Adk           | 11534  |
| SURF6   | 6838 NM_006753  | 2 Surf6         | 20935  |
|         | 7805 NM_006762  | 2 Laptm5        | 16792  |
| C12orf8 | 10961 NM_006817 | 2 Erp29         | 67397  |
| RAB40B  | 10966 NM_006822 | 2 Rab40b        | 217371 |
| DSTN    | 11034 NM_006870 | 2 Dstn          | 56431  |
| ATE1    | 11101 NM_007041 | 2 Ate1          | 11907  |
| HRASLS3 | 11145 NM_007069 | 2 Hrasls3       | 225845 |
|         | 11281 NM_007252 | 2 D130006K24Rik | 218030 |
| FBXO25  | 26260 NM_012173 | 2 Fbxo25        | 66822  |
| PHLDA3  | 23612 NM_012396 | 2 Phlda3        | 27280  |
|         | 28960 NM_014026 | 2 Dcps-pending  | 69305  |

|         |                 |                 |        |
|---------|-----------------|-----------------|--------|
|         | 29090 NM_014177 | 2 2700002I20Rik | 67105  |
|         | 26468 NM_014368 | 2 Lhx6          | 16874  |
| BBC3    | 27113 NM_014417 | 2 Bbc3          | 170770 |
| MYBBP1A | 10514 NM_014520 | 2 Mybbp1a       | 18432  |
|         | 9695 NM_014674  | 2 Edem-pending  | 192193 |
| SNAP91  | 9892 NM_014841  | 2 Snap91        | 20616  |
| RNF44   | 22838 NM_014901 | 2 Rnf44         | 105239 |
| ACINUS  | 22985 NM_014977 | 2 Acinus        | 56215  |
|         | 23299 NM_015250 | 2 Bicd2         | 76895  |
| PELO    | 53918 NM_015946 | 2 Pelo          | 105083 |
| MRPL37  | 51253 NM_016491 | 2 Mrpl37        | 56280  |
| NRN1    | 51299 NM_016588 | 2 Nrn1          | 68404  |
|         | 51324 NM_016630 | 2 D9Wsu18e      | 27965  |
|         | 55589 NM_017593 | 2 Bike-pending  | 140780 |
|         | 54801 NM_017645 | 2 6230416J20Rik | 230376 |
| SARS2   | 54938 NM_017827 | 2 Sars2         | 71984  |
| URKL1   | 54963 NM_017859 | 2 1110007H10Rik | 68556  |
|         | 54965 NM_017861 | 2 2010319C14Rik | 72084  |
|         | 55664 NM_017913 | 2 Cdc37l        | 67072  |
| CRTAC1  | 55118 NM_018058 | 2 Crtac1        | 72832  |
|         | 55186 NM_018155 | 2 C330005L02Rik | 192287 |
|         | 55207 NM_018184 | 2 2610313E07Rik | 67166  |
|         | 55425 NM_018559 | 2 1200011118Rik | 67467  |
|         | 54432 NM_018982 | 2 C030002N13Rik | 230584 |
|         | 57020 NM_020314 | 2 9030624J02Rik | 71517  |
| DDX24   | 57062 NM_020414 | 2 Ddx24         | 27225  |
| ANKRD3  | 54101 NM_020639 | 2 Ankrd3        | 72388  |
| CBX8    | 57332 NM_020649 | 2 Cbx8          | 30951  |
| MRPS12  | 6183 NM_021107  | 2 Mrps12        | 24030  |
| POLD4   | 57804 NM_021173 | 2 2410012M21Rik | 69745  |
|         | 59343 NM_021627 | 2 4930538C18Rik | 75826  |
|         | 64080 NM_022128 | 2 5230400M11Rik | 71336  |
| POPDC2  | 64091 NM_022135 | 2 Popdc2        | 64082  |
|         | 64786 NM_022771 | 2 4432405K22Rik | 66687  |
|         | 79020 NM_024054 | 2 AW209491      | 105351 |
|         | 79159 NM_024313 | 2 C78541        | 97961  |
|         | 79180 NM_024329 | 2 D4Wsu27e      | 27984  |
|         | 79576 NM_024528 | 2 2610020O08Rik | 67050  |
|         | 79728 NM_024675 | 2               | 233826 |
|         | 79812 NM_024756 | 2 Mmrn2-pending | 105450 |
|         | 79892 NM_024834 | 2 BC025641      | 210711 |
|         | 80217 NM_025145 | 2 4632415N18Rik | 70806  |
| WBSCR21 | 83451 NM_031295 | 2 Wbscr21       | 68758  |
|         | 28981 NM_031473 | 2 Cdv1          | 12589  |
|         | 83716 NM_031476 | 2 1810049K24Rik | 78892  |
|         | 83759 NM_031492 | 2 4921506I22Rik | 66704  |
|         | 83854 NM_031917 | 2 6330404E11Rik | 70726  |
|         | 83882 NM_031945 | 2 Ocsp-pending  | 208634 |
|         | 84188 NM_032228 | 2 3732409C05Rik | 67420  |
| USP31   | 84196 NM_032236 | 2 Usp31         | 170707 |
| BOK     | 666 NM_032515   | 2 Bok           | 51800  |
|         | 84662 NM_032575 | 2 Gli5          | 83396  |



|          |        |           |   |                  |        |
|----------|--------|-----------|---|------------------|--------|
| SSBP4    | 170463 | NM_032627 | 2 | 1210002E11Rik    | 76900  |
| JUB      | 84962  | NM_032876 | 2 | Jub              | 16475  |
|          | 114908 | NM_052932 | 2 | 2310075C12Rik    | 71929  |
|          | 116135 | NM_052953 | 2 | BC019794         | 218763 |
|          | 116039 | NM_053001 | 2 | Osr2             | 107587 |
| PFN2     | 5217   | NM_053024 | 2 | Pfn2             | 18645  |
|          | 94031  | NM_053044 | 2 | 9530081K03Rik    | 78558  |
|          | 22827  | NM_078480 | 2 | 2410104I19Rik    | 67959  |
|          | 92369  | NM_080862 | 2 | Ssb4-pending     | 211949 |
| TOR2A    | 27433  | NM_130459 | 2 | Tor2a            | 30933  |
|          | 89910  | NM_130466 | 2 | Ube3b            | 117146 |
|          | 126326 | NM_133261 | 2 | Rgs19ip3-pending | 209047 |
| BCL2L1   | 598    | NM_138578 | 2 | Bcl2l            | 12048  |
| ARX      | 170302 | NM_139058 | 2 | Arx              | 11878  |
| MAPKAPK5 | 8550   | NM_139078 | 2 | Mapkapk5         | 17165  |
| MATK     | 4145   | NM_139355 | 2 | Matk             | 17179  |
|          | 201255 | NM_144999 | 2 |                  | 217366 |
| PRKCDBP  | 112464 | NM_145040 | 2 | 6330514M23Rik    | 109042 |
|          | 197407 | NM_152652 | 2 | BC026401         | 233887 |
| CPNE2    | 221184 | NM_152727 | 2 | Cpne2            | 234577 |
|          | 255394 | NM_152772 | 2 | E430026E19Rik    | 216198 |
| RGN      | 9104   | NM_152869 | 2 | Rgn              | 19733  |
|          | 151835 | NM_153635 | 2 | A730016F12Rik    | 211232 |
| MEIS2    | 4212   | NM_170677 | 2 | Mrg1             | 17536  |
| KCNQ2    | 3785   | NM_172106 | 2 | Kcnq2            | 16536  |
| C14orf27 | 161198 | NM_175060 | 2 | 1200003C23Rik    | 66864  |
| STX12    | 23673  | NM_177424 | 2 | Stx12            | 100226 |
| VHL      | 7428   | NM_000551 | 2 | Vhlh             | 22346  |
| GRIA2    | 2891   | NM_000826 | 2 | Gria2            | 14800  |
| ITGA4    | 3676   | NM_000885 | 2 | Itga4            | 16401  |
| RPL3     | 6122   | NM_000967 | 2 | Rpl3             | 27367  |
| RPS26    | 6231   | NM_001029 | 2 | Rps26            | 27370  |
| FOXO3A   | 2309   | NM_001455 | 2 | Foxo3            | 56484  |
| EYA3     | 2140   | NM_001990 | 2 | Eya3             | 14050  |
| GOT2     | 2806   | NM_002080 | 2 | Got2             | 14719  |
| PSMB10   | 5699   | NM_002801 | 2 | Psmb10           | 19171  |
| PTBP1    | 5725   | NM_002819 | 2 | Ptbp1            | 19205  |
| REL      | 5966   | NM_002908 | 2 | Rel              | 19696  |
| SNX2     | 6643   | NM_003100 | 2 | Snx2             | 67804  |
| SEMA7A   | 8482   | NM_003612 | 2 | Sema7a           | 20361  |
| SOCS3    | 9021   | NM_003955 | 2 | Socs3            | 12702  |
| PDCD8    | 9131   | NM_004208 | 2 | Pdcd8            | 26926  |
| EPHB1    | 2047   | NM_004441 | 2 | Ephb1            | 270190 |
| MCM2     | 4171   | NM_004526 | 2 | Mcmd2            | 17216  |
| DCAMK1   | 9201   | NM_004734 | 2 | Dcamk1           | 13175  |
| RAB33A   | 9363   | NM_004794 | 2 | Rab33a           | 19337  |
| CRSP3    | 9439   | NM_004830 | 2 | Crsp3            | 70208  |
| USP10    | 9100   | NM_005153 | 2 | Uchrp            | 22224  |
| GRP58    | 2923   | NM_005313 | 2 | Grp58            | 14827  |
| SLC20A1  | 6574   | NM_005415 | 2 | Slc20a1          | 20515  |
| MAFB     | 9935   | NM_005461 | 2 | Mafb             | 16658  |
| MAP3K5   | 4217   | NM_005923 | 2 | Map3k5           | 26408  |

|          |                  |                 |        |
|----------|------------------|-----------------|--------|
| KHDRBS1  | 10657 NM_006559  | 2 Khdrbs1       | 20218  |
| UGP2     | 7360 NM_006759   | 2 Ugp2          | 216558 |
| NONO     | 4841 NM_007363   | 2 Nono          | 53610  |
| VAX2     | 25806 NM_012476  | 2 Vax2          | 24113  |
| SNX12    | 29934 NM_013346  | 2 Snx12         | 55988  |
| RNF11    | 26994 NM_014372  | 2 Rnf11         | 29864  |
| GTF2A1   | 2957 NM_015859   | 2 Gtf2a1        | 83602  |
|          | 51322 NM_016628  | 2 Wwp4-pending  | 225131 |
| RNF126   | 55658 NM_017876  | 2 2610010O19Rik | 70294  |
|          | 55079 NM_018008  | 2 Zfp312        | 54713  |
|          | 54707 NM_018066  | 2 Al838661      | 100210 |
|          | 55326 NM_018361  | 2 D8Erttd319e   | 52123  |
| SEPT3    | 55964 NM_019106  | 2 Sept3         | 24050  |
| MNT      | 4335 NM_020310   | 2 Mnt           | 17428  |
| SLC25A19 | 60386 NM_021734  | 2 Slc25a19      | 67283  |
|          | 64793 NM_022778  | 2 2410030J07Rik | 70012  |
| METTL1   | 4234 NM_023032   | 2 Mettl1        | 17299  |
| SLC25A22 | 79751 NM_024698  | 2 1300006L01Rik | 68267  |
|          | 80006 NM_024941  | 2 2410002O22Rik | 66975  |
|          | 80212 NM_025140  | 2 D5Bwg0834e    | 215707 |
| TSCOT    | 57864 NM_033051  | 2 Tscot         | 30936  |
|          | 113000 NM_058192 | 2 Rlucl-pending | 106707 |
| DPYSL2   | 1808 NM_001386   | 2 Dpysl2        | 12934  |
| RBBP7    | 5931 NM_002893   | 2 Rbbp7         | 245688 |
| NR2E1    | 7101 NM_003269   | 2 Nr2e1         | 21907  |
| VAV2     | 7410 NM_003371   | 2 Vav2          | 22325  |
| YWHAH    | 7533 NM_003405   | 2 Ywhah         | 22629  |
| MRPL40   | 64976 NM_003776  | 2 Mrpl40        | 18100  |
| BANF1    | 8815 NM_003860   | 2 Banf1         | 23825  |
| HAP1     | 9001 NM_003949   | 2 Hap1          | 15114  |
| KCNC1    | 3746 NM_004976   | 2 Kcnc1         | 16502  |
|          | 10366 NM_006076  | 2 A630095P14Rik | 231801 |
| RAN      | 5901 NM_006325   | 2 Ran           | 19384  |
| PPAN     | 56342 NM_020230  | 2               | 235036 |
| YIF1     | 10897 NM_020470  | 2 Yif1          | 68090  |
|          | 57491 NM_020731  | 2 Ahrr          | 11624  |
| WBSCR1   | 7458 NM_022170   | 2 Wbscr1        | 22384  |
|          | 84248 NM_032288  | 2 3830421F13Rik | 69823  |
| CACNA1B  | 774 NM_000718    | 2 Cacna1b       | 12287  |
| RASSF1   | 11186 NM_170713  | 2 Rassf1        | 56289  |
| PKP1     | 5317 NM_000299   | 3 Pkp1          | 18772  |
| DNAJA1   | 3301 NM_001539   | 3 Dnaja1        | 15502  |
| KPNB1    | 3837 NM_002265   | 3 Kpnb1         | 16211  |
| NPAS1    | 4861 NM_002517   | 3 Npas1         | 18142  |
| TMPO     | 7112 NM_003276   | 3 Tmpo          | 21917  |
| ARPC1B   | 10095 NM_005720  | 3 Arpc1b        | 11867  |
| SRPX     | 8406 NM_006307   | 3 SrpX          | 51795  |
| SFRS1    | 6426 NM_006924   | 3 Sfrs1         | 110809 |
| CELSR1   | 9620 NM_014246   | 3 Celsr1        | 12614  |
|          | 9865 NM_014817   | 3 1200009O22Rik | 66873  |
|          | 23174 NM_015144  | 3 Bdg29-pending | 142682 |
| C21orf80 | 23275 NM_015227  | 3 BC003494      | 80294  |

|           |                  |                 |        |
|-----------|------------------|-----------------|--------|
| VPS29     | 51699 NM_016226  | 3 Vps29         | 56433  |
| GPRC5B    | 51704 NM_016235  | 3 Gprc5b        | 64297  |
| PARVA     | 55742 NM_018222  | 3 Parva         | 57342  |
|           | 57409 NM_020679  | 3 2310075G12Rik | 69674  |
|           | 58504 NM_021226  | 3 B230341L19Rik | 239027 |
| XYLT2     | 64132 NM_022167  | 3 Xylt2         | 217119 |
|           | 66005 NM_023947  | 3 3110023E09Rik | 68038  |
|           | 80303 NM_025202  | 3 4931430I01Rik | 98363  |
|           | 90355 NM_033211  | 3 D1Ertd622e    | 52392  |
| APOA5     | 116519 NM_052968 | 3 Apoa5         | 66113  |
|           | 133522 NM_133263 | 3 Perc-pending  | 170826 |
|           | 90874 NM_138366  | 3               | 242109 |
| CKLFSF3   | 123920 NM_144601 | 3 9430096L06Rik | 68119  |
|           | 144715 NM_152442 | 3 BC021784      | 231724 |
| DSCR5     | 51227 NM_153681  | 3 Dscr5         | 56176  |
| IGFBP1    | 3484 NM_000596   | 3 Igfbp1        | 16006  |
| CTF1      | 1489 NM_001330   | 3 Ctf1          | 13019  |
| SLC1A4    | 6509 NM_003038   | 3 Slc1a4        | 55963  |
| USP4      | 7375 NM_003363   | 3 Usp4          | 22258  |
| MXI1      | 4601 NM_005962   | 3 Mxi1          | 17859  |
| NCOR2     | 9612 NM_006312   | 3 Ncor2         | 20602  |
|           | 23424 NM_014290  | 3 5730495N10Rik | 100121 |
| KCNK4     | 50801 NM_016611  | 3 Kcnk4         | 16528  |
| MMS19L    | 64210 NM_022362  | 3 Mms19l        | 72199  |
|           | 80019 NM_024954  | 3               | 226122 |
| PSMA7     | 5688 NM_152255   | 3 Psm7          | 26444  |
| NEK6      | 10783 NM_014397  | 3 Nek6          | 59126  |
|           | 26155 NM_015658  | 3 AF155546      | 57741  |
| FBXO21    | 23014 NM_033624  | 3 Fbxo21        | 231670 |
| GAD2      | 2572 NM_000818   | 4 Gad2          | 14417  |
| DDX15     | 1665 NM_001358   | 4 Ddx15         | 13204  |
| FHL1      | 2273 NM_001449   | 4 Fhl1          | 14199  |
| CTDP1     | 9150 NM_004715   | 4 4930563P03Rik | 67655  |
| LMNA      | 4000 NM_005572   | 4 Lmna          | 16905  |
| EIF4ENIF1 | 56478 NM_019843  | 4 Eif4enif1     | 74203  |
| ANKH      | 56172 NM_054027  | 4 ank           | 11732  |
|           | 148979 NM_147193 | 4 Gli6-pending  | 230587 |
| KREMEN1   | 83999 NM_153379  | 4 Kremen        | 84035  |
| HCN2      | 610 NM_001194    | 4 Hcn2          | 15166  |
| POLR1C    | 9533 NM_004875   | 4 Rpo1-1        | 20016  |
| NDRG1     | 10397 NM_006096  | 4 Ndr1          | 17988  |
|           | 54890 NM_017758  | 4 AW050020      | 268420 |
| XPO5      | 57510 NM_020750  | 4 Xpo5          | 72322  |
|           | 10728 NM_006601  | 4 Tebp-pending  | 56351  |
| ATP5D     | 513 NM_001687    | 4 0610008F14Rik | 66043  |
| RAB10     | 10890 NM_016131  | 4 Rab10         | 19325  |
| KREMEN2   | 79412 NM_145348  | 5 Kremen2       | 73016  |
| TERT      | 7015 NM_003219   | 5 Tert          | 21752  |
| ZNF398    | 57541 NM_170686  | 5 Zfp398        | 272347 |
| CYP1B1    | 1545 NM_000104   | 5 Cyp1b1        | 13078  |
|           | 22986 NM_014978  | 5 6330404A12Rik | 66673  |
| RAB6A     | 5870 NM_002869   | 5 Rab6          | 19346  |

|         |                 |            |       |
|---------|-----------------|------------|-------|
| CYP1A1  | 1543 NM_000499  | 5 Cyp1a1   | 13076 |
| EPB41L1 | 2036 NM_012156  | 6 Epb4.111 | 13821 |
| STC2    | 8614 NM_003714  | 6 Stc2     | 20856 |
| HSPG2   | 3339 NM_005529  | 8 Hspg2    | 15530 |
| PARK7   | 11315 NM_007262 | 8 Park7    | 57320 |

| Mouse refseq | Number of dre |
|--------------|---------------|
| NM_007428    | 1             |
| NM_007438    | 1             |
| NM_008130    | 1             |
| NM_008814    | 1             |
| NM_008434    | 1             |
| NM_025273    | 1             |
| NM_008810    | 1             |
| NM_008822    | 1             |
| NM_139227    | 1             |
| NM_133199    | 1             |
| NM_013675    | 1             |
| NM_010475    | 1             |
| NM_024188    | 1             |
| NM_011134    | 1             |
| NM_011658    | 1             |
| NM_010875    | 1             |
| NM_010508    | 1             |
| NM_007436    | 1             |
| NM_145129    | 1             |
| NM_009969    | 1             |
| NM_008066    | 1             |
| NM_010350    | 1             |
| NM_008193    | 1             |
| NM_008368    | 1             |
| NM_013566    | 1             |
| NM_008908    | 1             |
| NM_009079    | 1             |
| NM_012052    | 1             |
| NM_009204    | 1             |
| NM_009313    | 1             |
| NM_029638    | 1             |
| NM_026660    | 1             |
| NM_009636    | 1             |
| NM_013469    | 1             |
| NM_145455    | 1             |
| NM_007594    | 1             |
| NM_023243    | 1             |
| NM_133878    | 1             |
| NM_007705    | 1             |
| NM_025718    | 1             |
| NM_021354    | 1             |
| NM_007991    | 1             |
| NM_010634    | 1             |
| NM_008150    | 1             |
| NM_008063    | 1             |
| NM_025826    | 1             |
| NM_007415    | 1             |
| NM_133997    | 1             |
| NM_009722    | 1             |
| NM_025945    | 1             |
| NM_007563    | 1             |

|           |   |
|-----------|---|
| NM_133654 | 1 |
| NM_009861 | 1 |
| NM_009867 | 1 |
| NM_007711 | 1 |
| NM_146007 | 1 |
| NM_016669 | 1 |
| NM_025567 | 1 |
| NM_023240 | 1 |
| NM_007917 | 1 |
| NM_007943 | 1 |
| NM_007990 | 1 |
| NM_008092 | 1 |
| NM_018748 | 1 |
| NM_010477 | 1 |
| NM_008374 | 1 |
| NM_010591 | 1 |
| NM_013568 | 1 |
| NM_133815 | 1 |
| NM_008523 | 1 |
| NM_010749 | 1 |
| NM_019499 | 1 |
| NM_010784 | 1 |
| NM_009074 | 1 |
| NM_010885 | 1 |
| NM_021543 | 1 |
| NM_011045 | 1 |
| NM_146239 | 1 |
| NM_017462 | 1 |
| NM_008918 | 1 |
| NM_008854 | 1 |
| NM_019933 | 1 |
| NM_024229 | 1 |
| NM_011235 | 1 |
| NM_009055 | 1 |
| NM_026632 | 1 |
| NM_011305 | 1 |
| NM_013871 | 1 |
| NM_009122 | 1 |
| NM_011330 | 1 |
| NM_009157 | 1 |
| NM_019535 | 1 |
| NM_017400 | 1 |
| NM_011368 | 1 |
| NM_009196 | 1 |
| NM_033610 | 1 |
| NM_021336 | 1 |
| NM_139151 | 1 |
| NM_009360 | 1 |
| NM_031182 | 1 |
| NM_015799 | 1 |
| NM_031199 | 1 |
| NM_022653 | 1 |

|           |   |
|-----------|---|
| NM_008319 | 1 |
| NM_009413 | 1 |
| NM_011639 | 1 |
| NM_011643 | 1 |
| NM_009434 | 1 |
| NM_009437 | 1 |
| NM_009445 | 1 |
| NM_080560 | 1 |
| NM_025899 | 1 |
| NM_011701 | 1 |
| NM_133213 | 1 |
| NM_009575 | 1 |
| NM_030713 | 1 |
| NM_011747 | 1 |
| NM_013722 | 1 |
| NM_025287 | 1 |
| NM_145465 | 1 |
| NM_016782 | 1 |
| NM_007930 | 1 |
| NM_011613 | 1 |
| NM_010123 | 1 |
| NM_019804 | 1 |
| NM_009950 | 1 |
| NM_010072 | 1 |
| NM_011523 | 1 |
| NM_144931 | 1 |
| NM_027769 | 1 |
| NM_009740 | 1 |
| NM_025272 | 1 |
| NM_009890 | 1 |
| NM_024412 | 1 |
| NM_025331 | 1 |
| NM_146101 | 1 |
| NM_013610 | 1 |
| NM_144852 | 1 |
| NM_031194 | 1 |
| NM_025315 | 1 |
| NM_026896 | 1 |
| NM_009758 | 1 |
| NM_007635 | 1 |
| NM_133655 | 1 |
| NM_007730 | 1 |
| NM_008593 | 1 |
| NM_010460 | 1 |
| NM_026612 | 1 |
| NM_024220 | 1 |
| NM_019935 | 1 |
| NM_019519 | 1 |
| NM_009321 | 1 |
| NM_009410 | 1 |
| NM_011842 | 1 |
| NM_010950 | 1 |

|           |   |
|-----------|---|
| NM_026949 | 1 |
| NM_023055 | 1 |
| NM_008213 | 1 |
| NM_024245 | 1 |
| NM_011819 | 1 |
| NM_009593 | 1 |
| NM_016689 | 1 |
| NM_007668 | 1 |
| NM_022880 | 1 |
| NM_145741 | 1 |
| NM_021878 | 1 |
| NM_016749 | 1 |
| NM_011054 | 1 |
| NM_009208 | 1 |
| NM_013842 | 1 |
| NM_008003 | 1 |
| NM_146001 | 1 |
| NM_133879 | 1 |
| NM_022310 | 1 |
| NM_010592 | 1 |
| NM_008786 | 1 |
| NM_013723 | 1 |
| NM_011028 | 1 |
| NM_029573 | 1 |
| NM_012049 | 1 |
| NM_053075 | 1 |
| NM_010151 | 1 |
| NM_013692 | 1 |
| NM_011672 | 1 |
| NM_011696 | 1 |
| NM_007874 | 1 |
| NM_019478 | 1 |
| NM_023420 | 1 |
| NM_019793 | 1 |
| NM_025537 | 1 |
| NM_146012 | 1 |
| NM_009012 | 1 |
| NM_011588 | 1 |
| NM_011366 | 1 |
| NM_026758 | 1 |
| NM_134097 | 1 |
| NM_028753 | 1 |
| NM_008543 | 1 |
| NM_145426 | 1 |
| NM_008606 | 1 |
| NM_138745 | 1 |
| NM_009181 | 1 |
| NM_009947 | 1 |
| NM_018805 | 1 |
| NM_009578 | 1 |
| NM_019678 | 1 |
| NM_016871 | 1 |



|           |   |
|-----------|---|
| NM_133246 | 1 |
| NM_010878 | 1 |
| NM_008683 | 1 |
| NM_010902 | 1 |
| NM_010947 | 1 |
| NM_011602 | 1 |
| NM_009532 | 1 |
| NM_008942 | 1 |
| NM_011812 | 1 |
| NM_026056 | 1 |
| NM_025825 | 1 |
| NM_028835 | 1 |
| NM_009013 | 1 |
| NM_011400 | 1 |
| NM_013726 | 1 |
| NM_007570 | 1 |
| NM_010119 | 1 |
| NM_021547 | 1 |
| NM_026932 | 1 |
| NM_172769 | 1 |
| NM_009179 | 1 |
| NM_011444 | 1 |
| NM_021386 | 1 |
| NM_021314 | 1 |
| NM_011782 | 1 |
| NM_011549 | 1 |
| NM_145145 | 1 |
| NM_013754 | 1 |
| NM_023336 | 1 |
| NM_011384 | 1 |
| NM_080289 | 1 |
| NM_025968 | 1 |
| NM_029810 | 1 |
| NM_144902 | 1 |
| NM_175400 | 1 |
| NM_019874 | 1 |
| NM_007459 | 1 |
| NM_015816 | 1 |
| NM_017375 | 1 |
| NM_011070 | 1 |
| NM_019640 | 1 |
| NM_011489 | 1 |
| NM_011904 | 1 |
| NM_009428 | 1 |
| NM_023908 | 1 |
| NM_012025 | 1 |
| NM_133255 | 1 |
| NM_019925 | 1 |
| NM_013918 | 1 |
| NM_016895 | 1 |
| NM_008677 | 1 |
| NM_026911 | 1 |

|           |   |
|-----------|---|
| NM_026065 | 1 |
| NM_025427 | 1 |
| NM_146154 | 1 |
| NM_008761 | 1 |
| NM_144543 | 1 |
| NM_025486 | 1 |
| NM_019953 | 1 |
| NM_023154 | 1 |
| NM_019716 | 1 |
| NM_013873 | 1 |
| NM_133769 | 1 |
| NM_025862 | 1 |
| NM_145415 | 1 |
| NM_078478 | 1 |
| NM_028868 | 1 |
| NM_008018 | 1 |
| NM_013881 | 1 |
| NM_009289 | 1 |
| NM_080563 | 1 |
| NM_008959 | 1 |
| NM_138599 | 1 |
| NM_133999 | 1 |
| NM_080448 | 1 |
| NM_144787 | 1 |
| NM_033327 | 1 |
| NM_027882 | 1 |
| NM_153078 | 1 |
| NM_026194 | 1 |
| NM_019482 | 1 |
| NM_008721 | 1 |
| NM_025623 | 1 |
| NM_133784 | 1 |
| NM_011378 | 1 |
| NM_020276 | 1 |
| NM_172663 | 1 |
| NM_025400 | 1 |
| NM_146155 | 1 |
| NM_134091 | 1 |
| NM_133831 | 1 |
| NM_133787 | 1 |
| NM_175113 | 1 |
| NM_025547 | 1 |
| NM_134060 | 1 |
| NM_026179 | 1 |
| NM_021554 | 1 |
| NM_028445 | 1 |
| NM_026753 | 1 |
| NM_024282 | 1 |
| NM_025535 | 1 |
| NM_025446 | 1 |
| NM_009940 | 1 |
| NM_133984 | 1 |

|           |   |
|-----------|---|
| NM_016984 | 1 |
| NM_019790 | 1 |
| NM_175486 | 1 |
| NM_012048 | 1 |
| NM_021299 | 1 |
| NM_021449 | 1 |
| NM_019799 | 1 |
| NM_026697 | 1 |
| NM_029665 | 1 |
| NM_026313 | 1 |
| NM_025659 | 1 |
| NM_172730 | 1 |
| NM_027307 | 1 |
| NM_134075 | 1 |
| NM_025430 | 1 |
| NM_016924 | 1 |
| NM_013580 | 1 |
| NM_134065 | 1 |
| NM_025873 | 1 |
| NM_027727 | 1 |
| NM_016867 | 1 |
| NM_021450 | 1 |
| NM_023217 | 1 |
| NM_027411 | 1 |
| NM_027253 | 1 |
| NM_023684 | 1 |
| NM_138664 | 1 |
| NM_025372 | 1 |
| NM_172770 | 1 |
| NM_145497 | 1 |
| NM_026642 | 1 |
| NM_028680 | 1 |
| NM_145414 | 1 |
| NM_026019 | 1 |
| NM_021308 | 1 |
| NM_028381 | 1 |
| NM_133925 | 1 |
| NM_025991 | 1 |
| NM_025298 | 1 |
| NM_172565 | 1 |
| NM_030221 | 1 |
| NM_139139 | 1 |
| NM_172704 | 1 |
| NM_026995 | 1 |
| NM_153542 | 1 |
| NM_133718 | 1 |
| NM_134052 | 1 |
| NM_029456 | 1 |
| NM_027129 | 1 |
| NM_027992 | 1 |
| NM_172133 | 1 |
| NM_025456 | 1 |

|           |   |
|-----------|---|
| NM_134111 | 1 |
| NM_028036 | 1 |
| NM_133807 | 1 |
| NM_026342 | 1 |
| NM_172782 | 1 |
| NM_052977 | 1 |
| NM_145125 | 1 |
| NM_027671 | 1 |
| NM_013908 | 1 |
| NM_139065 | 1 |
| NM_027567 | 1 |
| NM_144913 | 1 |
| NM_008315 | 1 |
| NM_009120 | 1 |
| NM_023644 | 1 |
| NM_134068 | 1 |
| NM_026156 | 1 |
| NM_023175 | 1 |
| NM_019937 | 1 |
| NM_028844 | 1 |
| NM_027977 | 1 |
| NM_027057 | 1 |
| NM_030074 | 1 |
| NM_153166 | 1 |
| NM_027563 | 1 |
| NM_011806 | 1 |
| NM_027481 | 1 |
| NM_015768 | 1 |
| NM_172876 | 1 |
| NM_146129 | 1 |
| NM_028077 | 1 |
| NM_175115 | 1 |
| NM_025883 | 1 |
| NM_173182 | 1 |
| NM_028457 | 1 |
| NM_029946 | 1 |
| NM_133974 | 1 |
| NM_011796 | 1 |
| NM_026580 | 1 |
| NM_145410 | 1 |
| NM_026401 | 1 |
| NM_028146 | 1 |
| NM_053183 | 1 |
| NM_134142 | 1 |
| NM_030205 | 1 |
| NM_026058 | 1 |
| NM_026539 | 1 |
| NM_028003 | 1 |
| NM_146191 | 1 |
| NM_025512 | 1 |
| NM_027189 | 1 |
| NM_133765 | 1 |

|           |   |
|-----------|---|
| NM_146205 | 1 |
| NM_025690 | 1 |
| NM_053254 | 1 |
| NM_172302 | 1 |
| NM_026368 | 1 |
| NM_145376 | 1 |
| NM_133886 | 1 |
| NM_026496 | 1 |
| NM_030564 | 1 |
| NM_028787 | 1 |
| NM_023668 | 1 |
| NM_053100 | 1 |
| NM_029478 | 1 |
| NM_053197 | 1 |
| NM_013879 | 1 |
| NM_009332 | 1 |
| NM_023121 | 1 |
| NM_013662 | 1 |
| NM_172991 | 1 |
| NM_172898 | 1 |
| NM_009576 | 1 |
| NM_025685 | 1 |
| NM_144828 | 1 |
| NM_029661 | 1 |
| NM_145453 | 1 |
| NM_144906 | 1 |
| NM_025351 | 1 |
| NM_028873 | 1 |
| NM_025676 | 1 |
| NM_021608 | 1 |
| NM_172829 | 1 |
| NM_138581 | 1 |
| NM_026384 | 1 |
| NM_026048 | 1 |
| NM_008144 | 1 |
| NM_026559 | 1 |
| NM_145459 | 1 |
| NM_134003 | 1 |
| NM_029096 | 1 |
| NM_028054 | 1 |
| NM_134133 | 1 |
| NM_021455 | 1 |
| NM_010365 | 1 |
| NM_153287 | 1 |
| NM_172823 | 1 |
| NM_144815 | 1 |
| NM_028186 | 1 |
| NM_009522 | 1 |
| NM_010489 | 1 |
| NM_153418 | 1 |
| NM_153520 | 1 |
| NM_011221 | 1 |

|           |   |
|-----------|---|
| NM_172587 | 1 |
| NM_028075 | 1 |
| NM_027910 | 1 |
| NM_133998 | 1 |
| NM_009508 | 1 |
| NM_026740 | 1 |
| NM_011214 | 1 |
| NM_172519 | 1 |
| NM_153098 | 1 |
| NM_030206 | 1 |
| NM_134118 | 1 |
| NM_026044 | 1 |
| NM_011951 | 1 |
| NM_172624 | 1 |
| NM_144915 | 1 |
| NM_028052 | 1 |
| NM_153076 | 1 |
| NM_144897 | 1 |
| NM_016665 | 1 |
| NM_153397 | 1 |
| NM_133675 | 1 |
| NM_016862 | 1 |
| NM_053168 | 1 |
| NM_028938 | 1 |
| NM_030167 | 1 |
| NM_027397 | 1 |
| NM_011757 | 1 |
| NM_028015 | 1 |
| NM_025519 | 1 |
| NM_024479 | 1 |
| NM_145943 | 1 |
| NM_028943 | 1 |
| NM_008408 | 1 |
| NM_029338 | 1 |
| NM_026629 | 1 |
| NM_144873 | 1 |
| NM_025294 | 1 |
| NM_018811 | 1 |
| NM_026656 | 1 |
| NM_026067 | 1 |
| NM_173410 | 1 |
| NM_021292 | 1 |
| NM_029979 | 1 |
| NM_018883 | 1 |
| NM_022723 | 1 |
| NM_173429 | 1 |
| NM_027810 | 1 |
| NM_008010 | 2 |
| NM_010663 | 2 |
| NM_153556 | 2 |
| NM_028270 | 2 |
| NM_144923 | 2 |

|           |   |
|-----------|---|
| NM_008170 | 2 |
| NM_008800 | 2 |
| NM_031174 | 2 |
| NM_028193 | 2 |
| NM_009716 | 2 |
| NM_007653 | 2 |
| NM_021459 | 2 |
| NM_008406 | 2 |
| NM_008559 | 2 |
| NM_008722 | 2 |
| NM_008730 | 2 |
| NM_008826 | 2 |
| NM_019703 | 2 |
| NM_008857 | 2 |
| NM_153781 | 2 |
| NM_145480 | 2 |
| NM_025848 | 2 |
| NM_025965 | 2 |
| NM_016908 | 2 |
| NM_009367 | 2 |
| NM_009466 | 2 |
| NM_139298 | 2 |
| NM_009537 | 2 |
| NM_009862 | 2 |
| NM_018799 | 2 |
| NM_010052 | 2 |
| NM_011804 | 2 |
| NM_057172 | 2 |
| NM_019924 | 2 |
| NM_013515 | 2 |
| NM_023058 | 2 |
| NM_146057 | 2 |
| NM_010203 | 2 |
| NM_009328 | 2 |
| NM_013832 | 2 |
| NM_013477 | 2 |
| NM_016792 | 2 |
| NM_018768 | 2 |
| NM_033601 | 2 |
| NM_007803 | 2 |
| NM_007968 | 2 |
| NM_010834 | 2 |
| NM_008043 | 2 |
| NM_010566 | 2 |
| NM_007865 | 2 |
| NM_016688 | 2 |
| NM_013716 | 2 |
| NM_011563 | 2 |
| NM_026892 | 2 |
| NM_008548 | 2 |
| NM_133665 | 2 |
| NM_010840 | 2 |

|           |   |
|-----------|---|
| NM_011049 | 2 |
| NM_022992 | 2 |
| NM_023061 | 2 |
| NM_133755 | 2 |
| NM_010451 | 2 |
| NM_172833 | 2 |
| NM_144889 | 2 |
| NM_019929 | 2 |
| NM_010701 | 2 |
| NM_145439 | 2 |
| NM_172988 | 2 |
| NM_008986 | 2 |
| NM_013897 | 2 |
| NM_013919 | 2 |
| NM_018871 | 2 |
| NM_019818 | 2 |
| NM_025442 | 2 |
| NM_134147 | 2 |
| NM_021453 | 2 |
| NM_011973 | 2 |
| NM_019986 | 2 |
| NM_025352 | 2 |
| NM_015774 | 2 |
| NM_145711 | 2 |
| NM_153787 | 2 |
| NM_145543 | 2 |
| NM_033398 | 2 |
| NM_008655 | 2 |
| NM_013546 | 2 |
| NM_019570 | 2 |
| NM_145517 | 2 |
| NM_021316 | 2 |
| NM_009167 | 2 |
| NM_027494 | 2 |
| NM_053011 | 2 |
| NM_030165 | 2 |
| NM_029748 | 2 |
| NM_021715 | 2 |
| NM_025697 | 2 |
| NM_009697 | 2 |
| NM_138670 | 2 |
| NM_027106 | 2 |
| NM_134255 | 2 |
| NM_015826 | 2 |
| NM_011749 | 2 |
| NM_144908 | 2 |
| NM_138671 | 2 |
| NM_053162 | 2 |
| NM_010459 | 2 |
| NM_025757 | 2 |
| NM_146026 | 2 |
| NM_027272 | 2 |



|           |   |
|-----------|---|
| NM_146259 | 2 |
| NM_053155 | 2 |
| NM_029090 | 2 |
| NM_172822 | 2 |
| NM_029999 | 2 |
| NM_134023 | 2 |
| NM_028262 | 2 |
| NM_013643 | 2 |
| NM_007610 | 2 |
| NM_026731 | 2 |
| NM_080442 | 2 |
| NM_025290 | 2 |
| NM_152813 | 2 |
| NM_145530 | 2 |
| NM_030252 | 2 |
| NM_028954 | 2 |
| NM_027963 | 2 |
| NM_025721 | 2 |
| NM_145427 | 2 |
| NM_023824 | 2 |
| NM_172731 | 2 |
| NM_027539 | 2 |
| NM_172706 | 2 |
| NM_021876 | 2 |
| NM_144883 | 2 |
| NM_153081 | 2 |
| NM_008081 | 2 |
| NM_153057 | 2 |
| NM_019993 | 3 |
| NM_153798 | 3 |
| NM_008048 | 3 |
| NM_023739 | 3 |
| NM_011219 | 3 |
| NM_011245 | 3 |
| NM_019687 | 3 |
| NM_016907 | 3 |
| NM_011780 | 3 |
| NM_007709 | 3 |
| NM_010486 | 3 |
| NM_008241 | 3 |
| NM_016769 | 3 |
| NM_029878 | 3 |
| NM_007604 | 3 |
| NM_011816 | 3 |
| NM_026178 | 3 |
| NM_026883 | 3 |
| NM_010607 | 3 |
| NM_022331 | 3 |
| NM_144882 | 3 |
| NM_030246 | 3 |
| NM_025323 | 3 |
| NM_024216 | 3 |

|           |   |
|-----------|---|
| NM_008453 | 3 |
| NM_145596 | 3 |
| NM_015797 | 3 |
| NM_078479 | 3 |
| NM_020610 | 3 |
| NM_029842 | 3 |
| NM_025675 | 3 |
| NM_026819 | 3 |
| NM_029441 | 3 |
| NM_173022 | 3 |
| NM_172987 | 3 |
| NM_026403 | 3 |
| NM_146087 | 4 |
| NM_013703 | 4 |
| NM_009672 | 4 |
| NM_138652 | 5 |
| NM_025664 | 5 |
| NM_026732 | 5 |
| NM_172263 | 7 |
| NM_016702 | 1 |
| NM_007482 | 1 |
| NM_008280 | 1 |
| NM_008934 | 1 |
| NM_024236 | 1 |
| NM_007430 | 1 |
| NM_009784 | 1 |
| NM_015730 | 1 |
| NM_007811 | 1 |
| NM_025963 | 1 |
| NM_007573 | 1 |
| NM_173370 | 1 |
| NM_007693 | 1 |
| NM_013507 | 1 |
| NM_010247 | 1 |
| NM_133182 | 1 |
| NM_013562 | 1 |
| NM_007469 | 1 |
| NM_010581 | 1 |
| NM_016748 | 1 |
| NM_025797 | 1 |
| NM_007902 | 1 |
| NM_013514 | 1 |
| NM_010171 | 1 |
| NM_019739 | 1 |
| NM_008390 | 1 |
| NM_011837 | 1 |
| NM_008609 | 1 |
| NM_008719 | 1 |
| NM_008746 | 1 |
| NM_018766 | 1 |
| NM_026662 | 1 |
| NM_009207 | 1 |

|           |   |
|-----------|---|
| NM_009270 | 1 |
| NM_013736 | 1 |
| NM_008686 | 1 |
| NM_009393 | 1 |
| NM_146144 | 1 |
| NM_011694 | 1 |
| NM_009524 | 1 |
| NM_011484 | 1 |
| NM_007400 | 1 |
| NM_145527 | 1 |
| NM_019682 | 1 |
| NM_019709 | 1 |
| NM_080557 | 1 |
| NM_028779 | 1 |
| NM_021352 | 1 |
| NM_016805 | 1 |
| NM_025348 | 1 |
| NM_009214 | 1 |
| NM_015782 | 1 |
| NM_009481 | 1 |
| NM_023624 | 1 |
| NM_144541 | 1 |
| NM_013747 | 1 |
| NM_153552 | 1 |
| NM_010208 | 1 |
| NM_023040 | 1 |
| NM_010918 | 1 |
| NM_010631 | 1 |
| NM_019774 | 1 |
| NM_008568 | 1 |
| NM_008636 | 1 |
| NM_010926 | 1 |
| NM_020505 | 1 |
| NM_019392 | 1 |
| NM_021537 | 1 |
| NM_011993 | 1 |
| NM_010329 | 1 |
| NM_023140 | 1 |
| NM_026563 | 1 |
| NM_019837 | 1 |
| NM_134079 | 1 |
| NM_009298 | 1 |
| NM_010686 | 1 |
| NM_026129 | 1 |
| NM_139147 | 1 |
| NM_019771 | 1 |
| NM_013799 | 1 |
| NM_139269 | 1 |
| NM_175006 | 1 |
| NM_025785 | 1 |
| NM_013750 | 1 |
| NM_027030 | 1 |

|           |   |
|-----------|---|
| NM_025969 | 1 |
| NM_008500 | 1 |
| NM_133234 | 1 |
| NM_016776 | 1 |
| NM_138677 | 1 |
| NM_013669 | 1 |
| NM_134064 | 1 |
| NM_023190 | 1 |
| NM_029791 | 1 |
| NM_134058 | 1 |
| NM_025500 | 1 |
| NM_153529 | 1 |
| NM_138584 | 1 |
| NM_080708 | 1 |
| NM_173400 | 1 |
| NM_023637 | 1 |
| NM_026765 | 1 |
| NM_024464 | 1 |
| NM_025950 | 1 |
| NM_145123 | 1 |
| NM_138756 | 1 |
| NM_026011 | 1 |
| NM_026177 | 1 |
| NM_145550 | 1 |
| NM_027815 | 1 |
| NM_020494 | 1 |
| NM_023663 | 1 |
| NM_013926 | 1 |
| NM_011885 | 1 |
| NM_027196 | 1 |
| NM_029457 | 1 |
| NM_153196 | 1 |
| NM_022318 | 1 |
| NM_025706 | 1 |
| NM_134067 | 1 |
| NM_133800 | 1 |
| NM_025994 | 1 |
| NM_025937 | 1 |
| NM_172744 | 1 |
| NM_153127 | 1 |
| NM_145955 | 1 |
| NM_027559 | 1 |
| NM_145215 | 1 |
| NM_009879 | 1 |
| NM_030209 | 1 |
| NM_025717 | 1 |
| NM_145154 | 1 |
| NM_145363 | 1 |
| NM_027379 | 1 |
| NM_130879 | 1 |
| NM_016778 | 1 |
| NM_031184 | 1 |

|           |   |
|-----------|---|
| NM_133772 | 1 |
| NM_010590 | 1 |
| NM_133739 | 1 |
| NM_146052 | 1 |
| NM_054049 | 1 |
| NM_019410 | 1 |
| NM_030127 | 1 |
| NM_133691 | 1 |
| NM_145134 | 1 |
| NM_152800 | 1 |
| NM_054093 | 1 |
| NM_148951 | 1 |
| NM_009743 | 1 |
| NM_007492 | 1 |
| NM_010765 | 1 |
| NM_010768 | 1 |
| NM_153545 | 1 |
| NM_028444 | 1 |
| NM_146201 | 1 |
| NM_153507 | 1 |
| NM_146008 | 1 |
| NM_009060 | 1 |
| NM_170673 | 1 |
| NM_010825 | 1 |
| NM_010611 | 1 |
| NM_025809 | 1 |
| NM_133887 | 1 |
| NM_009507 | 2 |
| NM_013540 | 2 |
| NM_010576 | 2 |
| NM_013762 | 2 |
| NM_013765 | 2 |
| NM_019740 | 2 |
| NM_010166 | 2 |
| NM_010325 | 2 |
| NM_013640 | 2 |
| NM_008956 | 2 |
| NM_009044 | 2 |
| NM_026386 | 2 |
| NM_011352 | 2 |
| NM_007707 | 2 |
| NM_012019 | 2 |
| NM_173447 | 2 |
| NM_008564 | 2 |
| NM_019978 | 2 |
| NM_011228 | 2 |
| NM_027347 | 2 |
| NM_009462 | 2 |
| NM_007952 | 2 |
| NM_015747 | 2 |
| NM_010658 | 2 |
| NM_008580 | 2 |

|           |   |
|-----------|---|
| NM_011317 | 2 |
| NM_139297 | 2 |
| NM_023144 | 2 |
| NM_011912 | 2 |
| NM_018875 | 2 |
| NM_013876 | 2 |
| NM_031391 | 2 |
| NM_153085 | 2 |
| NM_144528 | 2 |
| NM_080433 | 2 |
| NM_133884 | 2 |
| NM_026792 | 2 |
| NM_011889 | 2 |
| NM_010813 | 2 |
| NM_026071 | 2 |
| NM_144527 | 2 |
| NM_010792 | 2 |
| NM_026646 | 2 |
| NM_025879 | 2 |
| NM_144819 | 2 |
| NM_021053 | 2 |
| NM_028009 | 2 |
| NM_009955 | 3 |
| NM_009031 | 3 |
| NM_152229 | 3 |
| NM_009500 | 3 |
| NM_011738 | 3 |
| NM_010922 | 3 |
| NM_011793 | 3 |
| NM_010404 | 3 |
| NM_008421 | 3 |
| NM_145566 | 3 |
| NM_009391 | 3 |
| NM_145610 | 3 |
| NM_026553 | 3 |
| NM_009644 | 3 |
| NM_033561 | 3 |
| NM_027226 | 3 |
| NM_007579 | 4 |
| NM_019713 | 4 |
| NM_019645 | 1 |
| NM_008298 | 1 |
| NM_008379 | 1 |
| NM_008718 | 1 |
| NM_011605 | 1 |
| NM_023142 | 1 |
| NM_016911 | 1 |
| NM_173374 | 1 |
| NM_009886 | 1 |
| NM_025817 | 1 |
| NM_080855 | 1 |
| NM_030262 | 1 |

|           |   |
|-----------|---|
| NM_019780 | 1 |
| NM_022420 | 1 |
| NM_020606 | 1 |
| NM_027162 | 1 |
| NM_153800 | 1 |
| NM_145828 | 1 |
| NM_026522 | 1 |
| NM_028889 | 1 |
| NM_133825 | 1 |
| NM_080434 | 1 |
| NM_133249 | 1 |
| NM_172863 | 1 |
| NM_024217 | 1 |
| NM_144912 | 1 |
| NM_019543 | 1 |
| NM_008341 | 2 |
| NM_007795 | 2 |
| NM_018861 | 2 |
| NM_011678 | 2 |
| NM_010847 | 2 |
| NM_011424 | 2 |
| NM_146142 | 2 |
| NM_008431 | 2 |
| NM_028152 | 2 |
| NM_145500 | 2 |
| NM_011969 | 2 |
| NM_021606 | 3 |
| NM_021303 | 3 |
| NM_145564 | 3 |
| NM_008078 | 1 |
| NM_007839 | 1 |
| NM_010211 | 1 |
| NM_026295 | 1 |
| NM_019390 | 1 |
| NM_023743 | 1 |
| NM_020332 | 1 |
| NM_147221 | 1 |
| NM_032396 | 1 |
| NM_008226 | 2 |
| NM_009085 | 2 |
| NM_010884 | 2 |
| NM_172943 | 2 |
| NM_028198 | 2 |
| NM_019766 | 3 |
| NM_025313 | 4 |
| NM_016676 | 4 |
| NM_028416 | 1 |
| NM_009354 | 2 |
| NM_027477 | 2 |
| NM_009994 | 3 |
| NM_025696 | 3 |
| NM_024287 | 5 |

|           |   |
|-----------|---|
| NM_009992 | 6 |
| NM_013510 | 1 |
| NM_011491 | 3 |
| NM_008305 | 1 |
| NM_020569 | 2 |
