# Supplementary material
Source: PubMed Central journal article supplement (PMC516056)
Supplement: nar_32_15_4512__6.pdf [file nar_32_15_4512__6.pdf]

| Human gene sym | Human locusli | Human refseq | Number of | Rat gene symbol | Rat locuslink | Rat refseq |
|----------------|---------------|--------------|-----------|-----------------|---------------|------------|
| FGFR3          | 2261          | NM_000142    | 1         |                 | 84489         | NM_053429  |
| SHH            | 6469          | NM_000193    | 1         |                 | 29499         | NM_017221  |
| KCNQ1          | 3784          | NM_000218    | 1         |                 | 84020         | NM_032073  |
| KIT            | 3815          | NM_000222    | 1         |                 | 64030         | NM_022264  |
| SCN4A          | 6329          | NM_000334    | 1         |                 | 25722         | NM_013178  |
| VDR            | 7421          | NM_000376    | 1         |                 | 24873         | NM_017058  |
| HSD17B1        | 3292          | NM_000413    | 1         | Hsd17b1         | 25322         | NM_012851  |
| SLC26A4        | 5172          | NM_000441    | 1         | Slc26a4         | 29440         | NM_019214  |
| THRB           | 7068          | NM_000461    | 1         | Thrb            | 24831         | NM_012672  |
| CYP11B2        | 1585          | NM_000498    | 1         | Cyp11b2         | 24294         | NM_012538  |
| KCNJ11         | 3767          | NM_000525    | 1         | Kcnj11          | 83535         | NM_031358  |
| NCAM1          | 4684          | NM_000615    | 1         | Ncam1           | 24586         | NM_031521  |
| ADORA2A        | 135           | NM_000675    | 1         | Adora2a         | 25369         | NM_053294  |
| ALDH3A1        | 218           | NM_000691    | 1         | Aldh3a1         | 25375         | NM_031972  |
| ALDH9A1        | 223           | NM_000696    | 1         | Aldh9a1         | 64040         | NM_022273  |
| CHRNA3         | 1136          | NM_000743    | 1         | Chrna3          | 25101         | NM_052805  |
| CHRN2          | 1141          | NM_000748    | 1         | Chrn2           | 54239         | NM_019297  |
| DRD4           | 1815          | NM_000797    | 1         | Drd4            | 25432         | NM_012944  |
| HTR6           | 3362          | NM_000871    | 1         | Htr6            | 64354         | NM_024365  |
| P4HB           | 5034          | NM_000918    | 1         | P4hb            | 25506         | NM_012998  |
| PDE1B          | 5153          | NM_000924    | 1         | Pde1b           | 29691         | NM_022710  |
| PTGER1         | 5731          | NM_000955    | 1         | Ptger1          | 25637         | NM_013100  |
| RPS9           | 6203          | NM_001013    | 1         |                 | 81772         | NM_031108  |
| RPS21          | 6227          | NM_001024    | 1         |                 | 81775         | NM_031111  |
| SLC2A4         | 6517          | NM_001042    | 1         | Slc2a4          | 25139         | NM_012751  |
| SLC12A2        | 6558          | NM_001046    | 1         |                 | 83629         | NM_031798  |
| ACTN3          | 89            | NM_001104    | 1         |                 | 171009        | NM_133424  |
| ANXA6          | 309           | NM_001155    | 1         |                 | 79125         | NM_024156  |
| AOX1           | 316           | NM_001159    | 1         |                 | 54349         | NM_019363  |
| APBA1          | 320           | NM_001163    | 1         |                 | 83589         | NM_031779  |
| BTEB1          | 687           | NM_001206    | 1         | Klf9            | 117560        | NM_057211  |
| ENTPD6         | 955           | NM_001247    | 1         |                 | 85260         | NM_053498  |
| CHK            | 1119          | NM_001277    | 1         | Chk             | 29194         | NM_017127  |
| CSNK1G2        | 1455          | NM_001319    | 1         |                 | 65278         | NM_023102  |
| CTBP1          | 1487          | NM_001328    | 1         | Ctbp1           | 29382         | NM_019201  |
| DNCI2          | 1781          | NM_001378    | 1         |                 | 116659        | NM_053880  |
| CELSR3         | 1951          | NM_001407    | 1         |                 | 83466         | NM_031320  |
| ACADSB         | 36            | NM_001609    | 1         | Acadsb          | 25618         | NM_013084  |
| AK2            | 204           | NM_001625    | 1         | Ak2             | 24184         | NM_030986  |
| AMD1           | 262           | NM_001634    | 1         | Amd1            | 81640         | NM_031011  |
| ARF1           | 375           | NM_001658    | 1         |                 | 64310         | NM_022518  |
| ATF4           | 468           | NM_001675    | 1         |                 | 79255         | NM_024403  |
| ATP12A         | 479           | NM_001676    | 1         |                 | 171028        | NM_133517  |
| ATP2B2         | 491           | NM_001683    | 1         | Atp2b2          | 24215         | NM_012508  |
| ATP5O          | 539           | NM_001697    | 1         |                 | 192241        | NM_138883  |
| BTC            | 685           | NM_001729    | 1         |                 | 64022         | NM_022256  |
| CRHR2          | 1395          | NM_001883    | 1         | Crhr2           | 64680         | NM_022714  |
| GFAP           | 2670          | NM_002055    | 1         | Gfap            | 24387         | NM_017009  |
| H2AFZ          | 3015          | NM_002106    | 1         |                 | 58940         | NM_022674  |
| HPN            | 3249          | NM_002151    | 1         | Hpn             | 29135         | NM_017112  |
| HSPD1          | 3329          | NM_002156    | 1         |                 | 63868         | NM_022229  |

|          |                 |           |                  |
|----------|-----------------|-----------|------------------|
| IL9R     | 3581 NM_002186  | 1 Il9r    | 24500 NM_017021  |
| LUM      | 4060 NM_002345  | 1         | 81682 NM_031050  |
| MAFK     | 7975 NM_002360  | 1         | 246760 NM_145673 |
| MYOG     | 4656 NM_002479  | 1         | 29148 NM_017115  |
| GPNMB    | 10457 NM_002510 | 1 Gpnmb   | 113955 NM_133298 |
| NME2     | 4831 NM_002512  | 1         | 83782 NM_031833  |
| NUP88    | 4927 NM_002532  | 1         | 113929 NM_053616 |
| PAFAH1B3 | 5050 NM_002573  | 1         | 114113 NM_053654 |
| PLD2     | 5338 NM_002663  | 1 Pld2    | 25097 NM_033299  |
| MAPK9    | 5601 NM_002752  | 1         | 50658 NM_017322  |
| PRSS11   | 5654 NM_002775  | 1 Prss11  | 65164 NM_031721  |
| PSMA5    | 5686 NM_002790  | 1 Psma5   | 29672 NM_017282  |
| SAFB     | 6294 NM_002967  | 1         | 64196 NM_022394  |
| MAPK12   | 6300 NM_002969  | 1 Mapk12  | 60352 NM_021746  |
| CX3CL1   | 6376 NM_002996  | 1         | 89808 NM_134455  |
| SH3GL3   | 6457 NM_003027  | 1         | 81921 NM_031238  |
| SLC6A12  | 6539 NM_003044  | 1         | 50676 NM_017335  |
| SNCB     | 6620 NM_003085  | 1 Sncb    | 113893 NM_080777 |
| SYT5     | 6861 NM_003180  | 1 Syt5    | 54309 NM_019350  |
| TFAM     | 7019 NM_003201  | 1         | 83474 NM_031326  |
| TGFA     | 7039 NM_003236  | 1 Tgfa    | 24827 NM_012671  |
| TPT1     | 7178 NM_003295  | 1         | 116646 NM_053867 |
| UGDH     | 7358 NM_003359  | 1         | 83472 NM_031325  |
| GCM1     | 8521 NM_003643  | 1 Gcma    | 29394 NM_017186  |
| BHLHB2   | 8553 NM_003670  | 1 Bhlhb2  | 79431 NM_053328  |
| ATP6V0E  | 8992 NM_003945  | 1         | 94170 NM_053578  |
| CAPN5    | 726 NM_004055   | 1         | 171495 NM_134461 |
| ECHS1    | 1892 NM_004092  | 1 Echs1   | 140547 NM_078623 |
| NINJ1    | 4814 NM_004148  | 1 Ninj1   | 25338 NM_012867  |
| SLC1A2   | 6506 NM_004171  | 1 Slc1a2  | 29482 NM_017215  |
| DAP      | 1611 NM_004394  | 1         | 64322 NM_022526  |
| SPARCL1  | 8404 NM_004684  | 1 Sparcl1 | 25434 NM_012946  |
|          | 9370 NM_004797  | 1         | 246253 NM_144744 |
| CDK5     | 1020 NM_004935  | 1         | 140908 NM_080885 |
| KCNA2    | 3737 NM_004974  | 1 Kcna2   | 25468 NM_012970  |
| MJD      | 4287 NM_004993  | 1         | 60331 NM_021702  |
| PDE1C    | 5137 NM_005020  | 1 Pde1c   | 81742 NM_031078  |
| TLE3     | 7090 NM_005078  | 1         | 84424 NM_053400  |
| CALM3    | 808 NM_005184   | 1 Calm3   | 24244 NM_012518  |
| EPHA3    | 2042 NM_005233  | 1 Epha3   | 29210 NM_031564  |
| GJA5     | 2702 NM_005266  | 1 Gja5    | 50563 NM_019280  |
| PCMT1    | 5110 NM_005389  | 1 Pcmt1   | 25604 NM_013073  |
| SIX3     | 6496 NM_005413  | 1         | 78974 NM_023990  |
| VEGFC    | 7424 NM_005429  | 1         | 114111 NM_053653 |
| GPR51    | 9568 NM_005458  | 1         | 83633 NM_031802  |
| STMN1    | 3925 NM_005563  | 1         | 29332 NM_017166  |
| DLL1     | 28514 NM_005618 | 1 Dll1    | 84010 NM_032063  |
| UFD1L    | 7353 NM_005659  | 1         | 84478 NM_053418  |
| VDAC3    | 7419 NM_005662  | 1         | 83532 NM_031355  |
| MADH7    | 4092 NM_005904  | 1 Madh7   | 81516 NM_030858  |
| MAT2A    | 4144 NM_005911  | 1         | 171347 NM_134351 |
| FXYD3    | 5349 NM_005971  | 1 Fxyd4   | 64190 NM_022388  |

|          |                 |            |                  |
|----------|-----------------|------------|------------------|
|          | 7846 NM_006009  | 1          | 64158 NM_022298  |
| SPATA2   | 9825 NM_006038  | 1          | 114210 NM_053675 |
|          | 10411 NM_006105 | 1          | 59326 NM_021690  |
| LGALS4   | 3960 NM_006149  | 1 Lgals4   | 25474 NM_012975  |
| NFE2L2   | 4780 NM_006164  | 1          | 83619 NM_031789  |
| PFKFB2   | 5208 NM_006212  | 1          | 24640 NM_080477  |
| PRKCD    | 5580 NM_006254  | 1 Prkcd    | 170538 NM_133307 |
| FBLN5    | 10516 NM_006329 | 1 Fbln5    | 29158 NM_019153  |
| LYPLA1   | 10434 NM_006330 | 1 Lypla1   | 25514 NM_013006  |
| HYOU1    | 10525 NM_006389 | 1          | 192235 NM_138867 |
| SLC2A1   | 6513 NM_006516  | 1          | 24778 NM_138827  |
| SC4MOL   | 6307 NM_006745  | 1          | 140910 NM_080886 |
| BTG2     | 7832 NM_006763  | 1 Btg2     | 29619 NM_017259  |
| STCH     | 6782 NM_006948  | 1 Stch     | 29734 NM_019271  |
| LECT1    | 11061 NM_007015 | 1          | 81512 NM_030854  |
| TEP1     | 7011 NM_007110  | 1 Tlp1     | 64523 NM_022591  |
| POMT1    | 10585 NM_007171 | 1          | 84430 NM_053406  |
| FBXO2    | 26232 NM_012168 | 1          | 85273 NM_053511  |
| AP2A2    | 161 NM_012305   | 1 Ap2a2    | 81637 NM_031008  |
| OSTF1    | 26578 NM_012383 | 1          | 259275 NM_148892 |
| PITPNB   | 23760 NM_012399 | 1          | 114561 NM_053742 |
| YWHAG    | 7532 NM_012479  | 1 Ywhag    | 56010 NM_019376  |
| PCSK1N   | 27344 NM_013271 | 1 Pcsk1n   | 246333 NM_019279 |
| CKTSF1B1 | 26585 NM_013372 | 1 Cktsf1b1 | 50566 NM_019282  |
| YWHAB    | 7529 NM_014052  | 1 Ywhab    | 56011 NM_019377  |
|          | 28992 NM_014067 | 1          | 246233 NM_139337 |
| KCNK2    | 3776 NM_014217  | 1          | 170899 NM_172041 |
| PGA5     | 5222 NM_014224  | 1          | 60372 NM_021753  |
|          | 23154 NM_014284 | 1          | 89791 NM_053543  |
| SDC3     | 9672 NM_014654  | 1          | 116673 NM_053893 |
|          | 23155 NM_015127 | 1          | 170927 NM_133414 |
|          | 23205 NM_015162 | 1          | 171410 NM_134389 |
| POLR1A   | 25885 NM_015425 | 1          | 83581 NM_031772  |
| RAP1B    | 5908 NM_015646  | 1          | 171337 NM_134346 |
| COL5A3   | 50509 NM_015719 | 1 Col5a3   | 60379 NM_021760  |
| TRIM17   | 51127 NM_016102 | 1 Trim17   | 64702 NM_022798  |
|          | 51677 NM_016151 | 1          | 64666 NM_022702  |
| TRPC4    | 7223 NM_016179  | 1          | 84494 NM_053434  |
| NDRG2    | 57447 NM_016250 | 1          | 171114 NM_133583 |
| AK3L1    | 50808 NM_016282 | 1          | 26956 NM_013218  |
| HSD17B7  | 51478 NM_016371 | 1 Hsd17b7  | 29540 NM_017235  |
| VAMP1    | 6843 NM_016830  | 1 Vamp1    | 25624 NM_013090  |
| LDHC     | 3948 NM_017448  | 1 Ldhc     | 29634 NM_017266  |
|          | 55006 NM_017910 | 1          | 192209 NM_138855 |
| NUDT4    | 11163 NM_019094 | 1          | 94267 NM_053598  |
| HTR7     | 3363 NM_019860  | 1 Htr7     | 65032 NM_022938  |
|          | 56949 NM_020196 | 1          | 245976 NM_139109 |
|          | 8470 NM_021069  | 1          | 114901 NM_053770 |
| SLC5A6   | 8884 NM_021095  | 1 Slc5a6   | 170551 NM_130746 |
| NGB      | 58157 NM_021257 | 1          | 85382 NM_033359  |
|          | 60370 NM_021732 | 1          | 171386 NM_134373 |
| DMRT1    | 1761 NM_021951  | 1          | 114498 NM_053706 |

|          |                  |           |                  |
|----------|------------------|-----------|------------------|
| ZNF148   | 7707 NM_021964   | 1 Znf148  | 58820 NM_031615  |
| SPHK1    | 8877 NM_021972   | 1         | 170897 NM_133386 |
|          | 64102 NM_022144  | 1         | 64104 NM_022290  |
| LHX5     | 64211 NM_022363  | 1 Lhx5    | 124451 NM_139036 |
|          | 80319 NM_025212  | 1 Idax    | 83824 NM_053342  |
|          | 81671 NM_030938  | 1         | 192129 NM_138839 |
| HNRPD    | 3184 NM_031370   | 1         | 79256 NM_024404  |
| CD99L2   | 83692 NM_031462  | 1         | 171485 NM_134459 |
|          | 84324 NM_032364  | 1         | 114481 NM_053690 |
| MKI67IP  | 84365 NM_032390  | 1         | 246042 NM_139186 |
| SLC30A2  | 7780 NM_032513   | 1 Slc30a2 | 25362 NM_012890  |
| PPP1R14A | 94274 NM_033256  | 1         | 114004 NM_130403 |
| VIAAT    | 140679 NM_080552 | 1         | 83612 NM_031782  |
| ASNS     | 440 NM_133436    | 1 Asns    | 25612 NM_013079  |
| CYGB     | 114757 NM_134268 | 1 Staap   | 170520 NM_130744 |
| MAPK14   | 1432 NM_139012   | 1         | 81649 NM_031020  |
| NUP98    | 4928 NM_139131   | 1 Nup98   | 81738 NM_031074  |
| SYNPR    | 132204 NM_144642 | 1         | 66030 NM_023974  |
| PROM2    | 150696 NM_144707 | 1         | 192211 NM_138857 |
| ISL2     | 64843 NM_145805  | 1         | 57233 NM_020471  |
| ATP2A2   | 488 NM_170665    | 1         | 29693 NM_017290  |
| MCP      | 4179 NM_172352   | 1 Mcp     | 29333 NM_019190  |
| IL1R2    | 7850 NM_173343   | 1         | 117022 NM_053953 |
|          | 257194 NM_173808 | 1         | 59318 NM_021682  |
|          | 149371 NM_175876 | 1         | 245709 NM_139043 |
| P2RY2    | 5029 NM_176071   | 1 P2ry2   | 29597 NM_017255  |
| CAPN3    | 825 NM_000070    | 1 Capn3   | 29155 NM_017117  |
| SCN5A    | 6331 NM_000335   | 1 Scn5a   | 25665 NM_013125  |
| GPD2     | 2820 NM_000408   | 1 Gpd2    | 25062 NM_012736  |
| IGF2     | 3481 NM_000612   | 1 Igf2    | 24483 NM_031511  |
| ADRA1D   | 146 NM_000678    | 1 Adra1d  | 29413 NM_024483  |
| GRIN2C   | 2905 NM_000835   | 1 Grin2c  | 24411 NM_012575  |
| PAM      | 5066 NM_000919   | 1 Pam     | 25508 NM_013000  |
| PTGS2    | 5743 NM_000963   | 1         | 29527 NM_017232  |
| CORT     | 1325 NM_001302   | 1 Cort    | 25305 NM_012835  |
| G6PT1    | 2542 NM_001467   | 1 G6pt1   | 29573 NM_031589  |
| GFRA2    | 2675 NM_001495   | 1 Gfra2   | 25136 NM_012750  |
| ADPRT    | 142 NM_001618    | 1 Adprt   | 25591 NM_013063  |
| ALCAM    | 214 NM_001627    | 1         | 79559 NM_031753  |
| C1S      | 716 NM_001734    | 1         | 192262 NM_138900 |
| GAPD     | 2597 NM_002046   | 1 Gapd    | 24383 NM_017008  |
| HPCAL1   | 3241 NM_002149   | 1         | 50871 NM_017356  |
| HSPE1    | 3336 NM_002157   | 1 Hspe1   | 25462 NM_012966  |
| ITIH3    | 3699 NM_002217   | 1         | 50693 NM_017351  |
| MDK      | 4192 NM_002391   | 1 Mdk     | 81517 NM_030859  |
| NPTX1    | 4884 NM_002522   | 1         | 266777 NM_153735 |
| PFKL     | 5211 NM_002626   | 1 Pflkl   | 25741 NM_013190  |
| PTHLH    | 5744 NM_002820   | 1 Pthlh   | 24695 NM_012636  |
| SLC18A3  | 6572 NM_003055   | 1 Slc18a3 | 60422 NM_031663  |
| SPAG4    | 6676 NM_003116   | 1         | 83623 NM_031792  |
| TRPC1    | 7220 NM_003304   | 1         | 89821 NM_053558  |
| VIM      | 7431 NM_003380   | 1         | 81818 NM_031140  |

|          |                  |            |                  |
|----------|------------------|------------|------------------|
| PRPF18   | 8559 NM_003675   | 1          | 171552 NM_138523 |
| HAND1    | 9421 NM_004821   | 1          | 59112 NM_021592  |
| STX8     | 9482 NM_004853   | 1 Stx8     | 59074 NM_031656  |
| SLC4A3   | 6508 NM_005070   | 1 Slc4a3   | 24781 NM_017049  |
| GFI1     | 2672 NM_005263   | 1 Gfi1     | 24388 NM_012566  |
| GLUD1    | 2746 NM_005271   | 1 Glud1    | 24399 NM_012570  |
| GPRK5    | 2869 NM_005308   | 1 Gprk5    | 59075 NM_030829  |
| PODXL    | 5420 NM_005397   | 1          | 192181 NM_138848 |
| INPP5D   | 3635 NM_005541   | 1 Inpp5d   | 54259 NM_019311  |
| CENTA1   | 11033 NM_006869  | 1          | 171097 NM_133567 |
| NRG1     | 3084 NM_013956   | 1          | 112400 NM_031588 |
| HERPUD1  | 9709 NM_014685   | 1          | 85430 NM_053523  |
|          | 51449 NM_016297  | 1          | 246302 NM_145085 |
| BET1L    | 51272 NM_016526  | 1 Bet1l    | 54400 NM_019368  |
| COQ3     | 51805 NM_017421  | 1 Coq3     | 29309 NM_019187  |
|          | 55690 NM_018026  | 1          | 171444 NM_134406 |
|          | 55523 NM_018702  | 1          | 117088 NM_133302 |
| MST1     | 4485 NM_020998   | 1 Mst1     | 24566 NM_024352  |
|          | 134526 NM_130767 | 1          | 170570 NM_130747 |
| ARHV     | 171177 NM_133639 | 1          | 171581 NM_138542 |
| CACNG1   | 786 NM_000727    | 1 Cacng1   | 29658 NM_019255  |
| ACTN1    | 87 NM_001102     | 1 Actn1    | 81634 NM_031005  |
| PCYT2    | 5833 NM_002861   | 1          | 89841 NM_053568  |
| SLC16A1  | 6566 NM_003051   | 1 Slc16a1  | 25027 NM_012716  |
| TGFB2    | 7042 NM_003238   | 1          | 81809 NM_031131  |
| THOP1    | 7064 NM_003249   | 1 Thop1    | 64517 NM_172075  |
| TXNL     | 9352 NM_004786   | 1          | 140922 NM_080887 |
| P2RXL1   | 9127 NM_005446   | 1 P2rxl1   | 25041 NM_012721  |
| PDE4A    | 5141 NM_006202   | 1 Pde4a    | 25638 NM_013101  |
| S100B    | 6285 NM_006272   | 1 S100b    | 25742 NM_013191  |
| ANP32A   | 8125 NM_006305   | 1 Anp32a   | 25379 NM_012903  |
| GLS      | 2744 NM_014905   | 1 Glis     | 24398 NM_012569  |
| NINJ2    | 4815 NM_016533   | 1          | 59115 NM_021595  |
| PCTK1    | 5127 NM_033019   | 1          | 81741 NM_031077  |
| MAF      | 4094 NM_005360   | 1 Maf      | 54267 NM_019318  |
| SIAT4B   | 6483 NM_006927   | 1 Siat5    | 64442 NM_031695  |
|          | 54716 NM_020208  | 1          | 113918 NM_133296 |
| ARRB1    | 408 NM_004041    | 1 Arrb1    | 25387 NM_012910  |
| SPATA7   | 55812 NM_018418  | 1          | 192225 NM_138862 |
|          | 103910 NM_033546 | 1          | 50685 NM_017343  |
| HPSE     | 10855 NM_006665  | 1 Hpse     | 64537 NM_022605  |
| PLA2G6   | 8398 NM_003560   | 1          | 116672 NM_053892 |
| MBL2     | 4153 NM_000242   | 2 Mbl2     | 64668 NM_022704  |
| PROC     | 5624 NM_000312   | 2 Proc     | 25268 NM_012803  |
| CACNA1B  | 774 NM_000718    | 2          | 257648 NM_147141 |
| CACNA2D1 | 781 NM_000722    | 2 Cacna2d1 | 25399 NM_012919  |
| CHRNA4   | 1137 NM_000744   | 2 Chrna4   | 25590 NM_024354  |
| CRH      | 1392 NM_000756   | 2          | 81648 NM_031019  |
| CYP26A1  | 1592 NM_000783   | 2          | 154985 NM_130408 |
| GRIN2D   | 2906 NM_000836   | 2 Grin2d   | 24412 NM_022797  |
| ADCY8    | 114 NM_001115    | 2 Adcy8    | 29241 NM_017142  |
| CDS1     | 1040 NM_001263   | 2          | 81925 NM_031242  |

|         |                  |           |                  |
|---------|------------------|-----------|------------------|
| G22P1   | 2547 NM_001469   | 2 G22p1   | 25019 NM_139080  |
| CRHBP   | 1393 NM_001882   | 2 Crhbp   | 29625 NM_139183  |
| EDN2    | 1907 NM_001956   | 2 Edn2    | 24324 NM_012549  |
| ITPKB   | 3707 NM_002221   | 2 Itpkb   | 54260 NM_019312  |
| KCNN4   | 3783 NM_002250   | 2         | 65206 NM_023021  |
| MGAT3   | 4248 NM_002409   | 2 Mgat3   | 29582 NM_019239  |
| PRPS2   | 5634 NM_002765   | 2 Prps2   | 24689 NM_012634  |
| SLC4A2  | 6522 NM_003040   | 2 Slc4a2  | 24780 NM_017048  |
| SQLE    | 6713 NM_003129   | 2 Sqle    | 29230 NM_017136  |
| TCF4    | 6925 NM_003199   | 2 Tcf4    | 84382 NM_053369  |
| UCP2    | 7351 NM_003355   | 2 Ucp2    | 54315 NM_019354  |
| BSN     | 8927 NM_003458   | 2 Bsn     | 29138 NM_019146  |
| MADD    | 8567 NM_003682   | 2         | 94193 NM_053585  |
| BANF1   | 8815 NM_003860   | 2         | 114087 NM_053631 |
| HAP1    | 9001 NM_003949   | 2 Hap1    | 29430 NM_024133  |
| DDIT3   | 1649 NM_004083   | 2 Ddit3   | 29467 NM_024134  |
| PDCD8   | 9131 NM_004208   | 2         | 83533 NM_031356  |
| ARL3    | 403 NM_004311    | 2 Arl3    | 64664 NM_022700  |
| RAB4A   | 5867 NM_004578   | 2 Rab4a   | 25532 NM_013019  |
| SLC9A5  | 6553 NM_004594   | 2         | 192215 NM_138858 |
| JAK2    | 3717 NM_004972   | 2 Jak2    | 24514 NM_031514  |
| PIP5K2A | 5305 NM_005028   | 2         | 116723 NM_053926 |
| FGR     | 2268 NM_005248   | 2         | 79113 NM_024145  |
| GPR24   | 2847 NM_005297   | 2         | 83567 NM_031758  |
| SCARB1  | 949 NM_005505    | 2 Scarb1  | 25073 NM_031541  |
| NR4A2   | 4929 NM_006186   | 2 Nr4a2   | 54278 NM_019328  |
| CIB1    | 10519 NM_006384  | 2         | 81823 NM_031145  |
|         | 10630 NM_006474  | 2 Gp38    | 54320 NM_019358  |
| TXNL2   | 10539 NM_006541  | 2 Txnl2   | 58815 NM_032614  |
| KHDRBS1 | 10657 NM_006559  | 2         | 117268 NM_130405 |
|         | 7805 NM_006762   | 2         | 89783 NM_053538  |
| C12orf8 | 10961 NM_006817  | 2         | 117030 NM_053961 |
|         | 25805 NM_012342  | 2         | 83837 NM_139082  |
|         | 28960 NM_014026  | 2         | 266605 NM_153302 |
|         | 26330 NM_014364  | 2         | 66020 NM_023964  |
|         | 9755 NM_014726   | 2         | 266764 NM_172021 |
| SNAP91  | 9892 NM_014841   | 2 Snap91  | 65178 NM_031728  |
| LPHN1   | 22859 NM_014921  | 2         | 65096 NM_022962  |
|         | 25907 NM_015444  | 2         | 117582 NM_057212 |
|         | 8862 NM_017413   | 2         | 58812 NM_031612  |
| DPYSL5  | 56896 NM_020134  | 2         | 65208 NM_023023  |
|         | 59343 NM_021627  | 2         | 78973 NM_023989  |
| SLC38A1 | 81539 NM_030674  | 2 Slc38a1 | 170567 NM_138832 |
|         | 83716 NM_031476  | 2         | 171547 NM_138518 |
| BCL2L1  | 598 NM_138578    | 2 Bcl2l1  | 24888 NM_031535  |
|         | 219928 NM_145015 | 2         | 266762 NM_153722 |
| SSBP3   | 23648 NM_145716  | 2         | 84354 NM_053358  |
| QDPR    | 5860 NM_000320   | 2         | 64192 NM_022390  |
| TTPA    | 7274 NM_000370   | 2 Ttpa    | 25571 NM_013048  |
| NR0B1   | 190 NM_000475    | 2 Nr0b1   | 58850 NM_053317  |
| EPO     | 2056 NM_000799   | 2 Epo     | 24335 NM_017001  |
| GTF3C1  | 2975 NM_001520   | 2         | 171063 NM_133541 |

|         |                  |          |                  |
|---------|------------------|----------|------------------|
| IFRD1   | 3475 NM_001550   | 2 lfrd1  | 29596 NM_019242  |
| INPPL1  | 3636 NM_001567   | 2 Inppl1 | 65038 NM_022944  |
| GPX4    | 2879 NM_002085   | 2 Gpx4   | 29328 NM_017165  |
| IRF1    | 3659 NM_002198   | 2 Irf1   | 24508 NM_012591  |
| YWHAH   | 7533 NM_003405   | 2 Ywhah  | 25576 NM_013052  |
| ATF3    | 467 NM_004024    | 2 Atf3   | 25389 NM_012912  |
| BNIP3L  | 665 NM_004331    | 2        | 140923 NM_080888 |
| HNRPU   | 3192 NM_004501   | 2        | 117280 NM_057139 |
| LRAT    | 9227 NM_004744   | 2 Lrat   | 64047 NM_022280  |
| KCNC1   | 3746 NM_004976   | 2 Kcnc1  | 25327 NM_012856  |
| GFRA1   | 2674 NM_005264   | 2 Gfra1  | 25454 NM_012959  |
| SLC20A1 | 6574 NM_005415   | 2        | 81826 NM_031148  |
| MADH2   | 4087 NM_005901   | 2 Madh2  | 29357 NM_019191  |
| DUOX2   | 50506 NM_014080  | 2        | 79107 NM_024141  |
| NSFL1C  | 55968 NM_016143  | 2        | 83809 NM_031981  |
| PFN2    | 5217 NM_053024   | 2        | 81531 NM_030873  |
| SLC35A4 | 113829 NM_080670 | 2        | 257647 NM_147140 |
| RGN     | 9104 NM_152869   | 2 Rgn    | 25106 NM_031546  |
| RBBP7   | 5931 NM_002893   | 2        | 83712 NM_031816  |
| SOCS3   | 9021 NM_003955   | 2        | 89829 NM_053565  |
| YIF1    | 10897 NM_020470  | 2        | 171441 NM_172017 |
|         | 115827 NM_138453 | 2        | 171058 NM_133536 |
| PLEC1   | 5339 NM_000445   | 3        | 64204 NM_022401  |
| IGFBP1  | 3484 NM_000596   | 3 Igfbp1 | 25685 NM_013144  |
| TAC1    | 6863 NM_003182   | 3 Tac1   | 24806 NM_012666  |
| TMPO    | 7112 NM_003276   | 3 Tmpo   | 25359 NM_012887  |
| TLE1    | 7088 NM_005077   | 3 Tle4   | 25565 NM_019141  |
| ARPC1B  | 10095 NM_005720  | 3 Arpc1b | 54227 NM_019289  |
| TRIM9   | 114088 NM_015163 | 3        | 155812 NM_130420 |
| INSR    | 3643 NM_000208   | 3 Insr   | 24954 NM_017071  |
| DNAJA1  | 3301 NM_001539   | 3        | 65028 NM_022934  |
| AXIN2   | 8313 NM_004655   | 3 Axin2  | 29134 NM_024355  |
|         | 23424 NM_014290  | 3        | 85425 NM_138871  |
| KCNK9   | 51305 NM_016601  | 3        | 84429 NM_053405  |
| APOA5   | 116519 NM_052968 | 3 Apoa5  | 140638 NM_080576 |
| XYLT2   | 64132 NM_022167  | 3        | 64134 NM_022296  |
| SS18L1  | 26039 NM_015558  | 3        | 192352 NM_138918 |
| FHL1    | 2273 NM_001449   | 4 Fhl1   | 25177 NM_145669  |
| MAP3K8  | 1326 NM_005204   | 4        | 116596 NM_053847 |
| SLC27A5 | 10998 NM_012254  | 4        | 79111 NM_024143  |
|         | 55832 NM_018448  | 4        | 117152 NM_054004 |
| ANKH    | 56172 NM_054027  | 4        | 114506 NM_053714 |
| LMNA    | 4000 NM_170707   | 4        | 60374 NM_021755  |
| GAD2    | 2572 NM_000818   | 4 Gad2   | 24380 NM_012563  |
| RAB10   | 10890 NM_016131  | 4        | 50993 NM_017359  |
| CYP1B1  | 1545 NM_000104   | 5 Cyp1b1 | 25426 NM_012940  |
| BSG     | 682 NM_001728    | 6 Bsg    | 25246 NM_012783  |
| STC2    | 8614 NM_003714   | 6        | 63878 NM_022230  |
