# Supplementary material
Source: PubMed Central journal article supplement (PMC516056)
Supplement: nar_32_15_4512__7.pdf [file nar_32_15_4512__7.pdf]

| Mouse gen | Mouse locuslink | Mouse refseq | Number of | Rat gene symt | Rat locuslink | Rat refseq | Number of |
|-----------|-----------------|--------------|-----------|---------------|---------------|------------|-----------|
| Aldh3a1   | 11670           | NM_007436    | 1         | Aldh3a1       | 25375         | NM_03197   | 1         |
| Aldh3a2   | 11671           | NM_007437    | 1         | Aldh3a2       | 65183         | NM_03173   | 1         |
| Ap2a2     | 11772           | NM_007459    | 1         | Ap2a2         | 81637         | NM_03100   | 1         |
| Arf1      | 11840           | NM_007476    | 1         |               | 64310         | NM_02251   | 1         |
| Btg2      | 12227           | NM_007570    | 1         | Btg2          | 29619         | NM_01725   | 1         |
| C4bp      | 12269           | NM_007576    | 1         | C4bpa         | 24235         | NM_01251   | 1         |
| Cacnb3    | 12297           | NM_007581    | 1         | Cacnb3        | 25297         | NM_01282   | 1         |
| Catnb     | 12387           | NM_007614    | 1         |               | 84353         | NM_05335   | 1         |
| Cdk5      | 12568           | NM_007668    | 1         |               | 140908        | NM_08088   | 1         |
| Cpd       | 12874           | NM_007754    | 1         | Cpd           | 25306         | NM_01283   | 1         |
| Cyp26a1   | 13082           | NM_007811    | 1         |               | 154985        | NM_13040   | 1         |
| Edn2      | 13615           | NM_007902    | 1         | Edn2          | 24324         | NM_01254   | 1         |
| Eif4e     | 13684           | NM_007917    | 1         | Eif4e         | 117045        | NM_05397   | 1         |
| Htr7      | 15566           | NM_008315    | 1         | Htr7          | 65032         | NM_02293   | 1         |
| Igfbp6    | 16012           | NM_008344    | 1         | Igfbp6        | 25641         | NM_01310   | 1         |
| Il9r      | 16199           | NM_008374    | 1         | Il9r          | 24500         | NM_01702   | 1         |
| Kcnq1     | 16535           | NM_008434    | 1         |               | 84020         | NM_03207   | 1         |
| Amacr     | 17117           | NM_008537    | 1         | Amacr         | 25284         | NM_01281   | 1         |
| Madh7     | 17131           | NM_008543    | 1         | Madh7         | 81516         | NM_03085   | 1         |
| Mras      | 17532           | NM_008624    | 1         | Mras          | 25482         | NM_01298   | 1         |
| Pak3      | 18481           | NM_008778    | 1         | Pak3          | 29433         | NM_01921   | 1         |
| Pcmt1     | 18537           | NM_008786    | 1         | Pcmt1         | 25604         | NM_01307   | 1         |
| Proc      | 19123           | NM_008934    | 1         | Proc          | 25268         | NM_01280   | 1         |
| Cxcl2     | 20310           | NM_009140    | 1         | Cxcl2         | 114105        | NM_05364   | 1         |
| Slc2a4    | 20528           | NM_009204    | 1         | Slc2a4        | 25139         | NM_01275   | 1         |
| Slc4a2    | 20535           | NM_009207    | 1         | Slc4a2        | 24780         | NM_01704   | 1         |
| Sqle      | 20775           | NM_009270    | 1         | Sqle          | 29230         | NM_01713   | 1         |
| Tac2      | 21334           | NM_009312    | 1         | Tac2          | 29191         | NM_01916   | 1         |
| Tfam      | 21780           | NM_009360    | 1         |               | 83474         | NM_03132   | 1         |
| Tnni2     | 21953           | NM_009405    | 1         | Tnni2         | 29389         | NM_01718   | 1         |
| Viaat     | 22348           | NM_009508    | 1         |               | 83612         | NM_03178   | 1         |
| Zfp103    | 22644           | NM_009543    | 1         |               | 84508         | NM_05343   | 1         |
| Aldh2     | 11669           | NM_009656    | 1         | Aldh2         | 29539         | NM_03241   | 1         |
| Atp2a2    | 11938           | NM_009722    | 1         |               | 29693         | NM_01729   | 1         |
| Bcl2l     | 12048           | NM_009743    | 1         | Bcl2l1        | 24888         | NM_03153   | 1         |
| Btg3      | 12228           | NM_009770    | 1         | Btg3          | 54230         | NM_01929   | 1         |
| Cacna2d1  | 12293           | NM_009784    | 1         | Cacna2d1      | 25399         | NM_01291   | 1         |
| Runx1     | 12394           | NM_009821    | 1         | Runx1         | 50662         | NM_01732   | 1         |
| Cnr2      | 12802           | NM_009924    | 1         |               | 57302         | NM_02054   | 1         |
| Cox4a     | 12857           | NM_009941    | 1         | Cox4a         | 29445         | NM_01720   | 1         |
| Dio2      | 13371           | NM_010050    | 1         | Dio2          | 65162         | NM_03172   | 1         |
| Efnb1     | 13641           | NM_010110    | 1         | Efnb1         | 25186         | NM_01708   | 1         |
| Fgr       | 14191           | NM_010208    | 1         |               | 79113         | NM_02414   | 1         |
| Fhl1      | 14199           | NM_010211    | 1         | Fhl1          | 25177         | NM_14566   | 1         |
| Fmo1      | 14261           | NM_010231    | 1         | Fmo1          | 25256         | NM_01279   | 1         |
| G22p1     | 14375           | NM_010247    | 1         | G22p1         | 25019         | NM_13908   | 1         |
| Ggta1     | 14594           | NM_010283    | 1         |               | 246766        | NM_14567   | 1         |
| Gp38      | 14726           | NM_010329    | 1         | Gp38          | 54320         | NM_01935   | 1         |
| Hck       | 15162           | NM_010407    | 1         | Hck           | 25734         | NM_01318   | 1         |
| Hivep2    | 15273           | NM_010437    | 1         | Hivep2        | 29721         | NM_02413   | 1         |
| Foxa2     | 15376           | NM_010446    | 1         | Hnf3b         | 25099         | NM_01274   | 1         |

|         |                 |           |                 |   |
|---------|-----------------|-----------|-----------------|---|
| Hoxa1   | 15394 NM_010449 | 1 Hoxa1   | 25607 NM_01307  | 1 |
| Hsd17b1 | 15485 NM_010475 | 1 Hsd17b1 | 25322 NM_01285  | 1 |
| Hspd1   | 15510 NM_010477 | 1         | 63868 NM_02222  | 1 |
| Igf2r   | 16004 NM_010515 | 1 Igf2r   | 25151 NM_01275  | 1 |
| Il10    | 16153 NM_010548 | 1 Il10    | 25325 NM_01285  | 1 |
| Laptm5  | 16792 NM_010686 | 1         | 89783 NM_05353  | 1 |
| Lat     | 16797 NM_010689 | 1         | 81511 NM_03085  | 1 |
| Lox     | 16948 NM_010728 | 1 Lox     | 24914 NM_01706  | 1 |
| Lrf     | 16969 NM_010731 | 1         | 117107 NM_05400 | 1 |
| Mmp7    | 17393 NM_010810 | 1 Mmp7    | 25335 NM_01286  | 1 |
| Mapt    | 17762 NM_010838 | 1 Mapt    | 29477 NM_01721  | 1 |
| Ncam1   | 17967 NM_010875 | 1 Ncam1   | 24586 NM_03152  | 1 |
| Nfe2l2  | 18024 NM_010902 | 1         | 83619 NM_03178  | 1 |
| Nfkbib  | 18036 NM_010908 | 1         | 81525 NM_03086  | 1 |
| Nppc    | 18159 NM_010933 | 1         | 114593 NM_05375 | 1 |
| P2rx4   | 18438 NM_011026 | 1 P2rx4   | 29659 NM_03159  | 1 |
| Pap     | 18489 NM_011036 | 1 Pap     | 24618 NM_05328  | 1 |
| Pde1c   | 18575 NM_011054 | 1 Pde1c   | 81742 NM_03107  | 1 |
| Padi3   | 18601 NM_011060 | 1         | 29520 NM_01723  | 1 |
| Pdpk1   | 18607 NM_011062 | 1         | 81745 NM_03108  | 1 |
| Pex11a  | 18631 NM_011068 | 1         | 85249 NM_05348  | 1 |
| Plod1   | 18822 NM_011122 | 1         | 116552 NM_05382 | 1 |
| Ptpn11  | 19247 NM_011202 | 1 Ptpn11  | 25622 NM_01308  | 1 |
| Rbl2    | 19651 NM_011250 | 1 Rb2     | 81758 NM_03109  | 1 |
| Reln    | 19699 NM_011261 | 1 Reln    | 24718 NM_08039  | 1 |
| Slc22a5 | 20520 NM_011396 | 1 Slc22a5 | 29726 NM_01926  | 1 |
| Slc2a1  | 20525 NM_011400 | 1         | 24778 NM_13882  | 1 |
| Tgfb1   | 21803 NM_011577 | 1 Tgfb1   | 59086 NM_02157  | 1 |
| Tmpo    | 21917 NM_011605 | 1 Tmpo    | 25359 NM_01288  | 1 |
| Trp53   | 22059 NM_011640 | 1 Tp53    | 24842 NM_03098  | 1 |
| Uchl1   | 22223 NM_011670 | 1 Uchl1   | 29545 NM_01723  | 1 |
| Ufd1l   | 22230 NM_011672 | 1         | 84478 NM_05341  | 1 |
| Ugcg    | 22234 NM_011673 | 1         | 83626 NM_03179  | 1 |
| Vdac3   | 22335 NM_011696 | 1         | 83532 NM_03135  | 1 |
| Zp2     | 22787 NM_011775 | 1         | 81828 NM_03115  | 1 |
| Fbln5   | 23876 NM_011812 | 1 Fbln5   | 29158 NM_01915  | 1 |
| Mapk14  | 26416 NM_011951 | 1         | 81649 NM_03102  | 1 |
| Psma4   | 26441 NM_011966 | 1 Psma4   | 29671 NM_01728  | 1 |
| Pclo    | 26875 NM_011995 | 1 Pclo    | 56768 NM_02009  | 1 |
| Htr3a   | 15561 NM_013561 | 1 Htr3a   | 79246 NM_02439  | 1 |
| Ldh3    | 16833 NM_013580 | 1 Ldhc    | 29634 NM_01726  | 1 |
| Ltbp2   | 16997 NM_013589 | 1 Ltbp2   | 59106 NM_02158  | 1 |
| Ninj1   | 18081 NM_013610 | 1 Ninj1   | 25338 NM_01286  | 1 |
| Odf2    | 18286 NM_013615 | 1 Odf2    | 29479 NM_01721  | 1 |
| Snap91  | 20616 NM_013669 | 1 Snap91  | 65178 NM_03172  | 1 |
| Yme1l1  | 27377 NM_013771 | 1         | 114217 NM_05368 | 1 |
| Mapk12  | 29857 NM_013871 | 1 Mapk12  | 60352 NM_02174  | 1 |
| Chrna4  | 11438 NM_015730 | 1 Chrna4  | 25590 NM_02435  | 1 |
| Sdcbp   | 53378 NM_016807 | 1         | 83841 NM_03198  | 1 |
| Sart1   | 20227 NM_016882 | 1 Sart1   | 29678 NM_03159  | 1 |
| Ak2     | 11637 NM_016895 | 1 Ak2     | 24184 NM_03098  | 1 |
| Trpc4   | 22066 NM_016984 | 1         | 84494 NM_05343  | 1 |

|             |        |           |   |         |        |          |   |
|-------------|--------|-----------|---|---------|--------|----------|---|
| Sh3gl3      | 20408  | NM_017400 | 1 |         | 81921  | NM_03123 | 1 |
| Ywhab       | 54401  | NM_018753 | 1 | Ywhab   | 56011  | NM_01937 | 1 |
| Ptf1a       | 19213  | NM_018809 | 1 |         | 117034 | NM_05396 | 1 |
| Slc23a2     | 54338  | NM_018824 | 1 |         | 50622  | NM_01731 | 1 |
| P140-pend   | 56013  | NM_018873 | 1 |         | 56029  | NM_01937 | 1 |
| Lmna        | 16905  | NM_019390 | 1 |         | 60374  | NM_02175 | 1 |
| Pitpnb      | 56305  | NM_019640 | 1 |         | 114561 | NM_05374 | 1 |
| Dbn1        | 56320  | NM_019813 | 1 | Dbn1    | 81653  | NM_03102 | 1 |
| ank         | 11732  | NM_020332 | 1 |         | 114506 | NM_05371 | 1 |
| Ak3l        | 56248  | NM_021299 | 1 |         | 26956  | NM_01321 | 1 |
| Tmod1       | 21916  | NM_021883 | 1 | Tmod1   | 25566  | NM_01304 | 1 |
| Gucy1a3     | 60596  | NM_021896 | 1 | Gucy1a3 | 25201  | NM_01709 | 1 |
| Fxyd7       | 57780  | NM_022007 | 1 |         | 63848  | NM_02200 | 1 |
| Retn        | 57264  | NM_022984 | 1 |         | 246250 | NM_14474 | 1 |
| Txnl2       | 30926  | NM_023140 | 1 | Txnl2   | 58815  | NM_03261 | 1 |
| Arpc1b      | 11867  | NM_023142 | 1 | Arpc1b  | 54227  | NM_01928 | 1 |
| 4733401H'   | 66706  | NM_023247 | 1 |         | 56769  | NM_02008 | 1 |
| Tubb3       | 22152  | NM_023279 | 1 |         | 246118 | NM_13925 | 1 |
| Bhlhb3      | 79362  | NM_024469 | 1 | Bhlhb3  | 117095 | NM_13330 | 1 |
| Atp6v0e     | 11974  | NM_025272 | 1 |         | 94170  | NM_05357 | 1 |
| 1100001F1   | 66105  | NM_025356 | 1 |         | 81920  | NM_03123 | 1 |
| 1110017C'   | 66164  | NM_025391 | 1 |         | 192180 | NM_13884 | 1 |
| Acadsb      | 66885  | NM_025826 | 1 | Acadsb  | 25618  | NM_01308 | 1 |
| Bbs2        | 67378  | NM_026116 | 1 | Bbs2    | 113948 | NM_05361 | 1 |
| Erp29       | 67397  | NM_026129 | 1 |         | 117030 | NM_05396 | 1 |
| 0610041O'   | 67439  | NM_026156 | 1 |         | 245976 | NM_13910 | 1 |
| D7Erttd753i | 52432  | NM_026391 | 1 |         | 246255 | NM_14474 | 1 |
| Prps2       | 110639 | NM_026662 | 1 | Prps2   | 24689  | NM_01263 | 1 |
| Gcipip-pen  | 68592  | NM_026780 | 1 |         | 170933 | NM_13341 | 1 |
| Dcps-pend   | 69305  | NM_027030 | 1 |         | 266605 | NM_15330 | 1 |
| Isl2        | 104360 | NM_027397 | 1 |         | 57233  | NM_02047 | 1 |
| Synpr       | 72003  | NM_028052 | 1 |         | 66030  | NM_02397 | 1 |
| 2610020G'   | 72157  | NM_028132 | 1 | Pgm1    | 24645  | NM_01703 | 1 |
| 3632410Gz   | 74011  | NM_028711 | 1 |         | 85262  | NM_05350 | 1 |
| 4930483Nz   | 75015  | NM_029144 | 1 |         | 56764  | NM_02008 | 1 |
| 4930538C'   | 75826  | NM_029457 | 1 |         | 78973  | NM_02398 | 1 |
| 4930579A1   | 75909  | NM_029478 | 1 |         | 192129 | NM_13883 | 1 |
| 5830461H'   | 76108  | NM_029519 | 1 |         | 114560 | NM_05374 | 1 |
| Cyp2d26     | 76279  | NM_029562 | 1 | Cyp2d2  | 25053  | NM_01273 | 1 |
| Cygb        | 114886 | NM_030206 | 1 | Staatp  | 170520 | NM_13074 | 1 |
| 1810049Kz   | 78892  | NM_030209 | 1 |         | 171547 | NM_13851 | 1 |
| Aacs        | 78894  | NM_030210 | 1 |         | 65984  | NM_02310 | 1 |
| Nptxr       | 73340  | NM_030689 | 1 |         | 81005  | NM_03084 | 1 |
| Slc19a1     | 20509  | NM_031196 | 1 | Slc19a1 | 29723  | NM_01729 | 1 |
| Tgfa        | 21802  | NM_031199 | 1 | Tgfa    | 24827  | NM_01267 | 1 |
| Sncb        | 104069 | NM_033610 | 1 | Sncb    | 113893 | NM_08077 | 1 |
| Pard3       | 93742  | NM_033620 | 1 |         | 81918  | NM_03123 | 1 |
| Ces3        | 104158 | NM_053200 | 1 | Ces3    | 113902 | NM_13329 | 1 |
| Pip5k2c     | 117150 | NM_054097 | 1 |         | 140607 | NM_08048 | 1 |
| Acaa1       | 113868 | NM_130864 | 1 | Acaa1   | 24157  | NM_01248 | 1 |
| Scn4a       | 110880 | NM_133199 | 1 |         | 25722  | NM_01317 | 1 |
| Xpnpep1     | 170750 | NM_133216 | 1 |         | 170751 | NM_13191 | 1 |

|          |                  |          |                 |   |
|----------|------------------|----------|-----------------|---|
| Pdk2     | 18604 NM_133667  | 1 Pdk2   | 81530 NM_03087  | 1 |
| Trf      | 22041 NM_133977  | 1 Tf     | 24825 NM_01705  | 1 |
| D19Wsu55 | 28000 NM_134129  | 1        | 246216 NM_13933 | 1 |
| Kif2c    | 73804 NM_134471  | 1        | 171529 NM_13447 | 1 |
| Adcy3    | 104111 NM_138305 | 1 Adcy3  | 64508 NM_13077  | 1 |
| Nme7     | 171567 NM_138314 | 1        | 171566 NM_13853 | 1 |
|          | 208263 NM_144791 | 1        | 246314 NM_14509 | 1 |
| Chrna3   | 110834 NM_145129 | 1 Chrna3 | 25101 NM_05280  | 1 |
| Pomt1    | 99011 NM_145145  | 1        | 84430 NM_05340  | 1 |
| Eif2b1   | 209354 NM_145371 | 1        | 64514 NM_17202  | 1 |
| Rho      | 212541 NM_145383 | 1 Rho    | 24717 NM_03344  | 1 |
| Rnpep    | 215615 NM_145417 | 1        | 81761 NM_03109  | 1 |
| Madd     | 228355 NM_145527 | 1        | 94193 NM_05358  | 1 |
| 0710001O | 76267 NM_146094  | 1        | 84575 NM_05344  | 1 |
| Gabt4    | 243616 NM_172890 | 1        | 79213 NM_02437  | 1 |
| Rln3     | 212108 NM_173184 | 1        | 266997 NM_17066 | 1 |
| Cds1     | 74596 NM_173370  | 1        | 81925 NM_03124  | 1 |
| Adprt1   | 11545 NM_007415  | 1 Adprt  | 25591 NM_01306  | 2 |
| Nr0b1    | 11614 NM_007430  | 1 Nr0b1  | 58850 NM_05331  | 2 |
| Dpep1    | 13479 NM_007876  | 1        | 94199 NM_05359  | 2 |
| G6pt1    | 14385 NM_008063  | 1 G6pt1  | 29573 NM_03158  | 2 |
| Gad2     | 14417 NM_008078  | 1 Gad2   | 24380 NM_01256  | 2 |
| Hadhsc   | 15107 NM_008212  | 1 Hadhsc | 113965 NM_05718 | 2 |
| Hand1    | 15110 NM_008213  | 1        | 59112 NM_02159  | 2 |
| Dnaja1   | 15502 NM_008298  | 1        | 65028 NM_02293  | 2 |
| Irf1     | 16362 NM_008390  | 1 Irf1   | 24508 NM_01259  | 2 |
| Kcns2    | 16539 NM_008436  | 1        | 66022 NM_02396  | 2 |
| Mobp     | 17433 NM_008614  | 1 Mobp   | 25037 NM_01272  | 2 |
| Nqo1     | 18104 NM_008706  | 1 Nqo1   | 24314 NM_01700  | 2 |
| Rgn      | 19733 NM_009060  | 1 Rgn    | 25106 NM_03154  | 2 |
| Slc4a3   | 20536 NM_009208  | 1 Slc4a3 | 24781 NM_01704  | 2 |
| Syng1    | 20972 NM_009303  | 1 Syng1  | 29205 NM_01916  | 2 |
| Ywhae    | 22627 NM_009536  | 1 Ywhae  | 29753 NM_03160  | 2 |
| Cd24a    | 12484 NM_009846  | 1 Cd24   | 25145 NM_01275  | 2 |
| Grin2c   | 14813 NM_010350  | 1 Grin2c | 24411 NM_01257  | 2 |
| Igfbp5   | 16011 NM_010518  | 1 Igfbp5 | 25285 NM_01281  | 2 |
| Mdk      | 17242 NM_010784  | 1 Mdk    | 81517 NM_03085  | 2 |
| Lamr1    | 16785 NM_011029  | 1 Lamr1  | 29236 NM_01713  | 2 |
| Pitx2    | 18741 NM_011098  | 1 Pitx2  | 54284 NM_01933  | 2 |
| Scn1b    | 20266 NM_011322  | 1        | 29686 NM_01728  | 2 |
| Sod3     | 20657 NM_011435  | 1 Sod3   | 25352 NM_01288  | 2 |
| Trpc1    | 22063 NM_011643  | 1        | 89821 NM_05355  | 2 |
| Vim      | 22352 NM_011701  | 1        | 81818 NM_03114  | 2 |
| Ifrd1    | 15982 NM_013562  | 1 Ifrd1  | 29596 NM_01924  | 2 |
| Podxl    | 27205 NM_013723  | 1        | 192181 NM_13884 | 2 |
| Abcc5    | 27416 NM_013790  | 1 Abcc5a | 116721 NM_05392 | 2 |
| Dbnl     | 13169 NM_013810  | 1 Dbnl   | 83527 NM_03135  | 2 |
| Nell2    | 54003 NM_016743  | 1        | 81734 NM_03107  | 2 |
| Hnrpu    | 51810 NM_016805  | 1        | 117280 NM_05713 | 2 |
| Tsnax    | 53424 NM_016909  | 1        | 64028 NM_02226  | 2 |
| Pfn2     | 18645 NM_019410  | 1        | 81531 NM_03087  | 2 |
| Selenbp2 | 20342 NM_019414  | 1        | 140927 NM_08089 | 2 |

|            |                  |   |         |                 |   |
|------------|------------------|---|---------|-----------------|---|
| Trpc3      | 22065 NM_019510  | 1 | Trpc3   | 60395 NM_02177  | 2 |
| Lrat       | 79235 NM_023624  | 1 | Lrat    | 64047 NM_02228  | 2 |
| Qdpr       | 110391 NM_024236 | 1 |         | 64192 NM_02239  | 2 |
| Afar       | 110198 NM_025337 | 1 |         | 171445 NM_13440 | 2 |
| Decr1      | 67460 NM_026172  | 1 | Decr1   | 117543 NM_05719 | 2 |
| Ssg1-pend  | 67896 NM_026439  | 1 | Ssg1    | 64387 NM_02254  | 2 |
| Ppp1ca     | 19045 NM_031868  | 1 | Ppp1ca  | 24668 NM_03152  | 2 |
| Ngfr       | 18053 NM_033217  | 1 |         | 24596 NM_01261  | 2 |
| Adar3-penc | 94191 NM_052977  | 1 |         | 117088 NM_13330 | 2 |
| Apoa5      | 66113 NM_080434  | 1 | Apoa5   | 140638 NM_08057 | 2 |
| Grin3b     | 170483 NM_130455 | 1 |         | 170796 NM_13330 | 2 |
| Il1rl2     | 107527 NM_133193 | 1 |         | 171106 NM_13357 | 2 |
| Bach-pend  | 70025 NM_133348  | 1 |         | 26759 NM_01321  | 2 |
| AW555139   | 99412 NM_133852  | 1 |         | 64528 NM_02259  | 2 |
| Cdipt      | 52858 NM_138754  | 1 |         | 192260 NM_13889 | 2 |
| 1700041K2  | 245865 NM_139151 | 1 |         | 83623 NM_03179  | 2 |
|            | 238271 NM_172805 | 1 |         | 171146 NM_13361 | 2 |
| Htr2a      | 15558 NM_172812  | 1 | Htr2a   | 29595 NM_01725  | 2 |
| Slc16a1    | 20501 NM_009196  | 1 | Slc16a1 | 25027 NM_01271  | 3 |
| Itgb5      | 16419 NM_010580  | 1 |         | 257645 NM_14713 | 3 |
| P2rx1      | 18440 NM_011028  | 1 | P2rx1   | 25041 NM_01272  | 3 |
| Thop1      | 50492 NM_022653  | 1 | Thop1   | 64517 NM_17207  | 3 |
| 1110033EC  | 68671 NM_024229  | 1 |         | 89841 NM_05356  | 3 |
| Lce-pendin | 170439 NM_130450 | 1 |         | 171402 NM_13438 | 3 |
| Chst10     | 98388 NM_145142  | 1 |         | 140568 NM_08039 | 3 |
| Xylt2      | 217119 NM_145828 | 1 |         | 64134 NM_02229  | 3 |
| Siat5      | 20444 NM_009179  | 1 | Siat5   | 64442 NM_03169  | 4 |
| 1500001M0  | 67938 NM_023402  | 1 |         | 50685 NM_01734  | 5 |
| Ctsh       | 13036 NM_007801  | 2 | Ctsh    | 25425 NM_01293  | 1 |
| Dll1       | 13388 NM_007865  | 2 | Dll1    | 84010 NM_03206  | 1 |
| Fgfr3      | 14184 NM_008010  | 2 |         | 84489 NM_05342  | 1 |
| Gpcr12     | 14738 NM_008151  | 2 | Gpcr12  | 80840 NM_03083  | 1 |
| Igfbp1     | 16006 NM_008341  | 2 | Igfbp1  | 25685 NM_01314  | 1 |
| Pde1b      | 18574 NM_008800  | 2 | Pde1b   | 29691 NM_02271  | 1 |
| Ppap2a     | 19012 NM_008903  | 2 |         | 64369 NM_02253  | 1 |
| Ptger4     | 19219 NM_008965  | 2 |         | 84023 NM_03207  | 1 |
| Slc1a1     | 20510 NM_009199  | 2 | Slc1a1  | 25550 NM_01303  | 1 |
| Tgfbr2     | 21813 NM_009371  | 2 | Tgfbr2  | 81810 NM_03113  | 1 |
| Ugdh       | 22235 NM_009466  | 2 |         | 83472 NM_03132  | 1 |
| Atf4       | 11911 NM_009716  | 2 |         | 79255 NM_02440  | 1 |
| Dpp4       | 13482 NM_010074  | 2 | Dpp4    | 25253 NM_01278  | 1 |
| Efna1      | 13636 NM_010107  | 2 |         | 94268 NM_05359  | 1 |
| Esr2       | 13983 NM_010157  | 2 |         | 25149 NM_01275  | 1 |
| Hipk3      | 15259 NM_010434  | 2 |         | 83617 NM_03178  | 1 |
| Lect1      | 16840 NM_010701  | 2 |         | 81512 NM_03085  | 1 |
| Khdrbs1    | 20218 NM_011317  | 2 |         | 117268 NM_13040 | 1 |
| Zfp148     | 22661 NM_011749  | 2 | Znf148  | 58820 NM_03161  | 1 |
| Pdcd8      | 26926 NM_012019  | 2 |         | 83533 NM_03135  | 1 |
| Clu        | 12759 NM_013492  | 2 | Clu     | 24854 NM_05302  | 1 |
| Hk2        | 15277 NM_013820  | 2 | Hk2     | 25059 NM_01273  | 1 |
| Dmrt1      | 50796 NM_015826  | 2 |         | 114498 NM_05370 | 1 |
| Syt5       | 53420 NM_016908  | 2 | Syt5    | 54309 NM_01935  | 1 |

|            |                  |           |                 |   |
|------------|------------------|-----------|-----------------|---|
| Ywhag      | 22628 NM_018871  | 2 Ywhag   | 56010 NM_01937  | 1 |
| Pepf-pendi | 58803 NM_021453  | 2         | 60372 NM_02175  | 1 |
| Pxmp4      | 59038 NM_021534  | 2         | 282634 NM_17222 | 1 |
| Polr2g     | 67710 NM_026329  | 2         | 117017 NM_05394 | 1 |
| Ppp1r14a   | 68458 NM_026731  | 2         | 114004 NM_13040 | 1 |
| 2310008N'  | 69534 NM_027106  | 2         | 171386 NM_13437 | 1 |
| D930010JC  | 107227 NM_134147 | 2         | 246233 NM_13933 | 1 |
| Mclc-pendi | 229725 NM_145543 | 2         | 170927 NM_13341 | 1 |
|            | 223453 NM_146057 | 2         | 64322 NM_02252  | 1 |
| Eif2b5     | 224045 NM_172265 | 2         | 192234 NM_13886 | 1 |
| Atp6v1b2   | 11966 NM_007509  | 2         | 117596 NM_05721 | 2 |
| Gabrd      | 14403 NM_008072  | 2 Gabrd   | 29689 NM_01728  | 2 |
| Gnb2-rs1   | 14694 NM_008143  | 2 Gnb2l1  | 83427 NM_13073  | 2 |
| Hspe1      | 15528 NM_008303  | 2 Hspe1   | 25462 NM_01296  | 2 |
| Nptx1      | 18164 NM_008730  | 2         | 266777 NM_15373 | 2 |
| Pfkl       | 18641 NM_008826  | 2 Pfkl    | 25741 NM_01319  | 2 |
| Tnfrsf8    | 21941 NM_009401  | 2 Tnfrsf8 | 25069 NM_01913  | 2 |
| Inpp5d     | 16331 NM_010566  | 2 Inpp5d  | 54259 NM_01931  | 2 |
| Nbn        | 27354 NM_013752  | 2         | 85482 NM_13887  | 2 |
| Slc20a1    | 20515 NM_015747  | 2         | 81826 NM_03114  | 2 |
| Stx8       | 55943 NM_018768  | 2 Stx8    | 59074 NM_03165  | 2 |
| B3galt4    | 54218 NM_019420  | 2         | 171079 NM_13355 | 2 |
| Ecel1      | 13599 NM_021306  | 2 Ecel1   | 60417 NM_02177  | 2 |
| Abcb6      | 74104 NM_023732  | 2 Abcb6   | 140669 NM_08058 | 2 |
| Egln3      | 112407 NM_028133 | 2 Egln3   | 54702 NM_01937  | 2 |
| Impa2      | 114663 NM_053261 | 2         | 282636 NM_17222 | 2 |
| Csda       | 56449 NM_139117  | 2         | 83807 NM_03197  | 2 |
| Arhv       | 228543 NM_145530 | 2         | 171581 NM_13854 | 2 |
| 5730495N'  | 100121 NM_146142 | 2         | 85425 NM_13887  | 2 |
|            | 223654 NM_153122 | 2         | 116684 NM_05390 | 2 |
| Socs3      | 12702 NM_007707  | 2         | 89829 NM_05356  | 3 |
| Gdi3       | 14569 NM_008112  | 2 Gdi3    | 29662 NM_01727  | 3 |
| Tgfb2      | 21808 NM_009367  | 2         | 81809 NM_03113  | 3 |
| Pctk1      | 18555 NM_011049  | 2         | 81741 NM_03107  | 3 |
| Rps26      | 27370 NM_013765  | 2         | 27139 NM_01322  | 3 |
| Txnl       | 53382 NM_016792  | 2         | 140922 NM_08088 | 3 |
| Avpr1a     | 54140 NM_016847  | 2         | 25107 NM_05301  | 3 |
| Gabarapl2  | 93739 NM_026693  | 2         | 64670 NM_02270  | 3 |
| Padi2      | 18600 NM_008812  | 2         | 29511 NM_01722  | 4 |
| Prcad-penc | 170677 NM_130878 | 2         | 93662 NM_05357  | 7 |
| Gdnf       | 14573 NM_010275  | 3 Gdnf    | 25453 NM_01913  | 1 |
| Hap1       | 15114 NM_010404  | 3 Hap1    | 29430 NM_02413  | 1 |
| Kcnk2      | 16526 NM_010607  | 3         | 170899 NM_17204 | 1 |
| Pitx1      | 18740 NM_011097  | 3 Pitx1   | 113983 NM_05362 | 1 |
| Banf1      | 23825 NM_011793  | 3         | 114087 NM_05363 | 1 |
| Aldh9a1    | 56752 NM_019993  | 3 Aldh9a1 | 64040 NM_02227  | 1 |
| Gpm6b      | 14758 NM_023122  | 3         | 192179 NM_13884 | 1 |
| Kcnc1      | 16502 NM_008421  | 3 Kcnc1   | 25327 NM_01285  | 2 |
| Stc2       | 20856 NM_011491  | 3         | 63878 NM_02223  | 2 |
| Ywhah      | 22629 NM_011738  | 3 Ywhah   | 25576 NM_01305  | 2 |
| Herpud1    | 64209 NM_022331  | 3         | 85430 NM_05352  | 2 |
| Cox5a      | 12858 NM_007747  | 3         | 252934 NM_14578 | 3 |

|         |                  |          |                 |   |
|---------|------------------|----------|-----------------|---|
| Rbbp7   | 245688 NM_009031 | 3        | 83712 NM_03181  | 3 |
| Siat8a  | 20449 NM_011374  | 3 Siat8a | 25280 NM_01281  | 3 |
| Yif1    | 68090 NM_026553  | 3        | 171441 NM_17201 | 3 |
| Cyp1b1  | 13078 NM_009994  | 3 Cyp1b1 | 25426 NM_01294  | 5 |
| Cacna1b | 12287 NM_007579  | 4        | 257648 NM_14714 | 1 |
| Anp32a  | 11737 NM_009672  | 4 Anp32a | 25379 NM_01290  | 3 |
| Rab10   | 19325 NM_016676  | 4        | 50993 NM_01735  | 4 |
| Atp12a  | 192113 NM_138652 | 5        | 171028 NM_13351 | 1 |

dre
