# Supplementary material
Source: PubMed Central journal article supplement (PMC516056)
Supplement: nar_32_15_4512__8.pdf [file nar_32_15_4512__8.pdf]

| Human gene | Human location | Human refseq | Number of | Mouse gene | Mouse location | Mouse refseq | Number of |
|------------|----------------|--------------|-----------|------------|----------------|--------------|-----------|
| NR0B1      | 190            | NM_000475    | 1         | Nr0b1      | 11614          | NM_007430    | 1         |
| ALDH3A1    | 218            | NM_000691    | 1         | Aldh3a1    | 11670          | NM_007436    | 1         |
| CACNA1B    | 774            | NM_000718    | 1         | Cacna1b    | 12287          | NM_007579    | 2         |
| PDE1B      | 5153           | NM_000924    | 1         | Pde1b      | 18574          | NM_008800    | 1         |
| SLC2A4     | 6517           | NM_001042    | 1         | Slc2a4     | 20528          | NM_009204    | 1         |
| ACADSB     | 36             | NM_001609    | 1         | Acadsb     | 66885          | NM_025826    | 1         |
| EDN2       | 1907           | NM_001956    | 1         | Edn2       | 13615          | NM_007902    | 1         |
| HSPD1      | 3329           | NM_002156    | 1         | Hspd1      | 15510          | NM_010477    | 1         |
| NPTX1      | 4884           | NM_002522    | 1         | Nptx1      | 18164          | NM_008730    | 1         |
| PCYT2      | 5833           | NM_002861    | 1         | 1110033E0  | 68671          | NM_024229    | 1         |
| RBBP7      | 5931           | NM_002893    | 1         | Rbbp7      | 245688         | NM_009031    | 1         |
| SNCB       | 6620           | NM_003085    | 1         | Sncb       | 104069         | NM_033610    | 1         |
| THOP1      | 7064           | NM_003249    | 1         | Thop1      | 50492          | NM_022653    | 1         |
| UGDH       | 7358           | NM_003359    | 1         | Ugdh       | 22235          | NM_009466    | 2         |
| SOCS3      | 9021           | NM_003955    | 1         | Socs3      | 12702          | NM_007707    | 2         |
| HNRPU      | 3192           | NM_004501    | 1         | Hnrpu      | 51810          | NM_016805    | 1         |
| CDK5       | 1020           | NM_004935    | 1         | Cdk5       | 12568          | NM_007668    | 1         |
| PCMT1      | 5110           | NM_005389    | 1         | Pcmt1      | 18537          | NM_008786    | 1         |
| DLL1       | 28514          | NM_005618    | 1         | Dll1       | 13388          | NM_007865    | 1         |
| VDAC3      | 7419           | NM_005662    | 1         | Vdac3      | 22335          | NM_011696    | 1         |
| ANP32A     | 8125           | NM_006305    | 1         | Anp32a     | 11737          | NM_009672    | 1         |
| FBLN5      | 10516          | NM_006329    | 1         | Fbln5      | 23876          | NM_011812    | 1         |
| KHDRBS1    | 10657          | NM_006559    | 1         | Khdrbs1    | 20218          | NM_011317    | 1         |
| POMT1      | 10585          | NM_007171    | 1         | Pomt1      | 99011          | NM_145145    | 1         |
| PITPNB     | 23760          | NM_012399    | 1         | Pitpnb     | 56305          | NM_019640    | 1         |
| YWHAG      | 7532           | NM_012479    | 1         | Ywhag      | 22628          | NM_018871    | 1         |
|            | 28960          | NM_014026    | 1         | Dcps-pend  | 69305          | NM_027030    | 1         |
| HERPUD1    | 9709           | NM_014685    | 1         | Herpud1    | 64209          | NM_022331    | 2         |
| TRPC4      | 7223           | NM_016179    | 1         | Trpc4      | 22066          | NM_016984    | 1         |
| LDHC       | 3948           | NM_017448    | 1         | Ldh3       | 16833          | NM_013580    | 1         |
|            | 56949          | NM_020196    | 1         | 0610041O   | 67439          | NM_026156    | 1         |
| YIF1       | 10897          | NM_020470    | 1         | Yif1       | 68090          | NM_026553    | 2         |
| DMRT1      | 1761           | NM_021951    | 1         | Dmrt1      | 50796          | NM_015826    | 2         |
| ZNF148     | 7707           | NM_021964    | 1         | Zfp148     | 22661          | NM_011749    | 2         |
| PFN2       | 5217           | NM_053024    | 1         | Pfn2       | 18645          | NM_019410    | 1         |
| ISL2       | 64843          | NM_145805    | 1         | Isl2       | 104360         | NM_027397    | 1         |
| IGFBP1     | 3484           | NM_000596    | 2         | Igfbp1     | 16006          | NM_008341    | 2         |
| CACNA2D    | 781            | NM_000722    | 2         | Cacna2d1   | 12293          | NM_009784    | 1         |
| G22P1      | 2547           | NM_001469    | 2         | G22p1      | 14375          | NM_010247    | 1         |
| SLC4A2     | 6522           | NM_003040    | 2         | Slc4a2     | 20535          | NM_009207    | 1         |
| SQLE       | 6713           | NM_003129    | 2         | Sqle       | 20775          | NM_009270    | 1         |
| FGR        | 2268           | NM_005248    | 2         | Fgr        | 14191          | NM_010208    | 1         |
| SLC20A1    | 6574           | NM_005415    | 2         | Slc20a1    | 20515          | NM_015747    | 1         |
| C12orf8    | 10961          | NM_006817    | 2         | Erp29      | 67397          | NM_026129    | 1         |
|            | 59343          | NM_021627    | 2         | 4930538C   | 75826          | NM_029457    | 1         |
| RAB10      | 10890          | NM_016131    | 3         | Rab10      | 19325          | NM_016676    | 3         |
| CYP1B1     | 1545           | NM_000104    | 4         | Cyp1b1     | 13078          | NM_009994    | 3         |
| STC2       | 8614           | NM_003714    | 4         | Stc2       | 20856          | NM_011491    | 2         |

| Rat gene symb | Rat locuslink | Rat refseq | Number of dre |
|---------------|---------------|------------|---------------|
| Nr0b1         | 58850         | NM_05331   | 1             |
| Aldh3a1       | 25375         | NM_03197   | 1             |
|               | 257648        | NM_14714   | 1             |
| Pde1b         | 29691         | NM_02271   | 1             |
| Slc2a4        | 25139         | NM_01275   | 1             |
| Acadsb        | 25618         | NM_01308   | 1             |
| Edn2          | 24324         | NM_01254   | 1             |
|               | 63868         | NM_02222   | 1             |
|               | 266777        | NM_15373   | 1             |
|               | 89841         | NM_05356   | 2             |
|               | 83712         | NM_03181   | 1             |
| Sncb          | 113893        | NM_08077   | 1             |
| Thop1         | 64517         | NM_17207   | 2             |
|               | 83472         | NM_03132   | 1             |
|               | 89829         | NM_05356   | 2             |
|               | 117280        | NM_05713   | 1             |
|               | 140908        | NM_08088   | 1             |
| Pcmt1         | 25604         | NM_01307   | 1             |
| Dll1          | 84010         | NM_03206   | 1             |
|               | 83532         | NM_03135   | 1             |
| Anp32a        | 25379         | NM_01290   | 1             |
| Fbln5         | 29158         | NM_01915   | 1             |
|               | 117268        | NM_13040   | 1             |
|               | 84430         | NM_05340   | 1             |
|               | 114561        | NM_05374   | 1             |
| Ywhag         | 56010         | NM_01937   | 1             |
|               | 266605        | NM_15330   | 1             |
|               | 85430         | NM_05352   | 1             |
|               | 84494         | NM_05343   | 1             |
| Ldhc          | 29634         | NM_01726   | 1             |
|               | 245976        | NM_13910   | 1             |
|               | 171441        | NM_17201   | 2             |
|               | 114498        | NM_05370   | 1             |
| Znf148        | 58820         | NM_03161   | 1             |
|               | 81531         | NM_03087   | 2             |
|               | 57233         | NM_02047   | 1             |
| Igfbp1        | 25685         | NM_01314   | 1             |
| Cacna2d1      | 25399         | NM_01291   | 1             |
| G22p1         | 25019         | NM_13908   | 1             |
| Slc4a2        | 24780         | NM_01704   | 1             |
| Sqle          | 29230         | NM_01713   | 1             |
|               | 79113         | NM_02414   | 1             |
|               | 81826         | NM_03114   | 2             |
|               | 117030        | NM_05396   | 1             |
|               | 78973         | NM_02398   | 1             |
|               | 50993         | NM_01735   | 3             |
| Cyp1b1        | 25426         | NM_01294   | 4             |
|               | 63878         | NM_02223   | 2             |
