# Supplementary material
Source: PubMed Central journal article supplement (PMC516056)
Supplement: nar_32_15_4512__9.pdf [file nar_32_15_4512__9.pdf]

| Gene Name                                                | Gene Symbol | LocusLink | Refseq    |
|----------------------------------------------------------|-------------|-----------|-----------|
| cytochrome P450, family 1, subfamily a, polypeptide 1    | Cyp1a1      | 13076     | NM_009992 |
| cytochrome P450, family 1, subfamily b, polypeptide 1    | Cyp1b1      | 13078     | NM_009994 |
| nuclear receptor subfamily 0, group B, member 1          | Nr0b1       | 11614     | NM_007430 |
| RAB10, member RAS oncogene family                        | Rab10       | 19325     | NM_016676 |
| stanniocalcin 2                                          | Stc2        | 20856     | NM_011491 |
| UDP-glucose dehydrogenase                                | Ugdh        | 22235     | NM_009466 |
| calcium channel, voltage-dependent, alpha2/delta subunit | Cacna2d     | 12293     | NM_009784 |
| heat shock protein 1 (chaperonin)                        | Hspd1       | 15510     | NM_010477 |
| KH domain containing, RNA binding, signal transduction   | Khdnbs1     | 20218     | NM_011317 |
| protein-L-isoaspartate (D-aspartate) O-methyltransferase | Pcmt1       | 18537     | NM_008786 |
| profilin 2                                               | Pfn2        | 18645     | NM_019410 |
| solute carrier family 4 (anion exchanger), member 2      | Slc4a2      | 20535     | NM_009207 |
| squalene epoxidase                                       | Sqle        | 20775     | NM_009270 |
| 3-monooxygenase/tryptophan 5-monooxygenase activation    | Ywhag       | 22628     | NM_018871 |
| zinc finger protein 148                                  | Znf148      | 22661     | NM_011749 |
| acyl-Coenzyme A dehydrogenase, short/branched chain      | Acadsb      | 66885     | NM_025826 |
| heterogeneous nuclear ribonucleoprotein U                | Hnrpu       | 51810     | NM_016805 |
| insulin related protein 2 (islet 2)                      | Isl2        | 104360    | NM_027397 |
| voltage-dependent anion channel 3                        | Vdac3       | 22335     | NM_011696 |

| 5' Primer            | 3' Primer            | Amp. Size |
|----------------------|----------------------|-----------|
| tgctttgttctgccacag   | ggggcatgaattcttgat   | 211       |
| cagatccgctgaactgaaca | ctacgaccgcttctccatc  | 195       |
| gcctcactggtagctcttag | aggtggctaccacattccag | 201       |
| gacctctggaagcagtgag  | acacatccagcgttgacat  | 170       |
| aagggaaaggcagctctggt | tcaagtaggcaggaagga   | 202       |
| cacagcctccctgtctaagc | cccttgctctccaccatta  | 172       |
| actgctgcatgtccatgc   | ctccacagaaaggctgctc  | 206       |
| ccagagggctcactgtgact | ctgactccccttgactctgg | 213       |
| tgggtcccaaaaactca    | gacacgaccgcttacacaga | 160       |
| gggtttggtctgctccat   | taaggtcgtggaggaagtg  | 201       |
| ttgcgcatgggtgactta   | ccttagtccctctgctgtgc | 223       |
| cctgtgggtgctttcaat   | cacgtggactcccttcaat  | 228       |
| ttcagcctgaccttgct    | acaacaccagcatgcacaat | 199       |
| catctcaacaggctgggtt  | gctcctgcctgtctagtg   | 224       |
| ggaaatgatgaaaggcctca | acatgaagcaggaggattgc | 213       |
| aggggaaggacctaccagaa | ctatggccaccacctgtt   | 250       |
| ggacggaacaattccaagaa | cccactattcgctcacaat  | 174       |
| ttgacacagccaaatccaaa | gctgtccatgccagtttat  | 166       |
